# Supplementary material for: Remarkable Enhancement of Catalytic Activity of Cu‐Complexes in the Electrochemical Hydrogen Evolution Reaction by Using Triply Fused Porphyrin
Source: PubMed Central journal article supplement (PMC10107348; doi:10.1002/cssc.202201146), 2022-12-14
Supplement: CSSC-16-0-s001.pdf [file CSSC-16-0-s001.pdf]

# ChemSusChem

Supporting Information

## **Remarkable Enhancement of Catalytic Activity of Cu-Complexes in the Electrochemical Hydrogen Evolution Reaction by Using Triply Fused Porphyrin\*\***

Shubhadeep Chandra<sup>+</sup>, Arijit Singha Hazari<sup>+</sup>, Qian Song, David Hunger, Nicolás. I. Neuman, Joris van Slageren,<sup>\*</sup> Elias Klemm,<sup>\*</sup> and Biprajit Sarkar<sup>\*©</sup> 2022 The Authors. ChemSusChem published by Wiley-VCH GmbH. This is an open access article under the terms of the Creative Commons Attribution License, which permits use, distribution and reproduction in any medium, provided the original work is properly cited.

# Remarkable Enhancement of Catalytic Activity of Cu-Complexes in the Electrochemical Hydrogen Evolution Reaction (HER) by Using Triply-Fused Porphyrin

Shubhadeep Chandra, † Arijit Singha Hazari, † Qian Song, David Hunger, Nicolás. I. Neuman, Joris van Slageren, \* Elias Klemm, \* and Biprajit Sarkar\*

---

[a] S. Chandra, Dr. A. S. Hazari, Dr. N. I. Neuman, Prof. Dr. B. Sarkar  
Lehrstuhl für Anorganische Koordinationschemie, Institut für Anorganische Chemie  
Universität Stuttgart  
Pfaffenwaldring 55, D-70569, Stuttgart, Germany  
E-mail: [biprajit.sarkar@iac.uni-stuttgart.de](mailto:biprajit.sarkar@iac.uni-stuttgart.de)

[b] Dr. Q. Song, E. Klemm  
Institute of Chemical Technology, University of Stuttgart  
Pfaffenwaldring 55, 70569, Stuttgart, Germany  
E-mail: [elias.klemm@itc.uni-stuttgart.de](mailto:elias.klemm@itc.uni-stuttgart.de)

[c] D. Hunger, J. van Slageren  
Institut für Physikalische Chemie, Universität Stuttgart  
Pfaffenwaldring 55, 70569 Stuttgart, Germany  
E-mail: [slageren@ipc.uni-stuttgart.de](mailto:slageren@ipc.uni-stuttgart.de)

[d] Dr. N. I. Neuman  
Instituto de Desarrollo Tecnológico para la Industria Química CCT  
INTEC, UNL-CONICET, Predio CONICET Santa Fe  
Dr. Alberto Cassano, Ruta Nacional N° 168, Km 0, Paraje El Pozo, (S3000ZAA) Santa Fe, Argentina

† S.C and A.S.H contributed equally to this work

### General experimental considerations and instrumentation:

Unless otherwise stated, all experiments were carried out under an argon atmosphere using standard Schlenk techniques or in a MBraun Unilab SP GloveBox. Pyrrole was obtained from Sigma Aldrich and distilled prior to use. Commercially available chemicals like 3,5-Di-tert-butyl-2-methoxybenzaldehyde (abcr GmbH), Sc(OTf)<sub>3</sub> (Sigma Aldrich), 2,3-Dichloro-5,6-dicyano-1,4-benzoquinone (abcr GmbH), Cu(OAc)<sub>2</sub>·4H<sub>2</sub>O (Sigma Aldrich) were used without further purification. KC<sub>8</sub> were synthesized according to literature procedure.<sup>[1]</sup> Dry DMF was purchased from Sigma Aldrich (99.8% extra dry) and was used as received. Other solvents were purified from the MBRAUN MB-SPS-800 solvent system. All of the solvents were degassed by standard techniques prior to use. Column chromatography was conducted using silica from MachereyNagel (Silica 60, 0.04–0.063 mm). <sup>1</sup>H NMR spectra were recorded on NMR spectra were acquired on Bruker Avance 250 MHz and Bruker Avance 400 MHz spectrometers at 20 °C. Chemical shifts are reported in parts per million (relative to the tetramethylsilane signal) with reference to the residual solvent peaks.<sup>[2]</sup> Mass spectrometry was performed on Bruker Daltonics Microtof-Q (Electron spray ionization (ESI) at 0.4 bar, 200° C, dry gas flow 4.0 l/min with a set capillary of 4500 V, end plate offset -450 V in positive mode and at 1.0 bar, set capillary 2200 V in negative mode) or Varian MAT 711 (EI at 70 eV) mass spectrometers. UV–Vis–NIR spectra were recorded with an on a J&M TIDAS spectrometer instrument.

### Electrochemistry:

Cyclic voltammograms were recorded with a PalmSens4 potentiostat or with a Metrohm Autolab PGSTAT101 by working in anhydrous and degassed DMF (99.8% extra dry, Sigma Aldrich) with 0.1 M <sup>n</sup>Bu<sub>4</sub>PF<sub>6</sub> (dried, >99.0%, electrochemical grade, Fluka) as the supporting electrolyte. Concentrations of the complexes were about 1 × 10<sup>-4</sup> M. A three-electrode setup was used with a glassy carbon working electrode, a coiled platinum wire as counter electrode, and a coiled silver wire as a pseudoreference electrode. The ferrocene/ferrocenium couple was used as an internal reference. Electrochemical proton reduction experiments were carried out in distilled and degassed DMF solution of 1 × 10<sup>-4</sup> M catalysts with 0.1 M <sup>n</sup>Bu<sub>4</sub>PF<sub>6</sub> as supporting electrolyte and varying amounts of TFA. The experiments were carried out with 3-mm diameter glassy carbon working electrode which was polished with 0.3 μm alumina slurry prior to each scan. While, coiled platinum wire and coiled silver wire were used as counter and pseudoreference electrodes respectively. All the measurements in electrochemical HER were referenced against ferrocene/ferrocenium redox couple.

### **Bulk electrolysis measurements:**

Bulk electrolysis measurements were performed in a two-compartment cell divided by microporous membrane (Celgard® 2325). A 0.06 mM DMF solution of **1** or 0.12 mM of **2** containing 0.1 M  $n\text{Bu}_4\text{PF}_6$  and 0.1 M of TFA was sparged with  $\text{N}_2$  before measurements. The measurements were performed with Orignalys (OGF500) using a carbon paper ( $1 \times 1 \text{ cm}^2$  as catalytic area) as a working electrode, platinum foil as a counter electrode and a coiled silver wire as a pseudoreference electrode. Samples of the headspace (4 mL) were taken using a gastight syringe. The headspace composition was analyzed using a gas chromatograph equipped with molecular-sieve columns and dual TCD and FID detectors using helium as a carrier gas.

### **Control experiments:**

*Reduction by  $\text{CoCp}_2$ :* The reduction of **1** by  $\text{CoCp}_2$  was monitored via UV-Vis-NIR spectroscopy at room temperature. One electron reduced species,  $\mathbf{1}^-$  was generated by a treatment of 10 mL solution of **1** (20 mg (0.011 mmol) in dry  $\text{CH}_2\text{Cl}_2$  with one equivalent of  $\text{CoCp}_2$  (2.07 mg, 0.011 mmol) under inert atmosphere. The reaction was allowed to stir for 30 min followed by removal of a solvent under reduced pressure. The residue was dissolved again in dry  $\text{CH}_2\text{Cl}_2$  and UV-Vis-NIR spectra of the species was recorded immediately. The resulting solution was further treated with excess TFA and UV-Vis-NIR spectra of the resulting species was also recorded.

*Reduction by  $\text{KC}_8$ :* Two electron reduced species,  $\mathbf{1}^{2-}$  was generated by treating 10 mL solution of **1** (20 mg (0.011 mmol) in dry  $\text{CH}_2\text{Cl}_2$  with 2 equivalents of  $\text{KC}_8$  under inert reaction conditions. The color of the solution changed immediately from violet to deep green and the reaction was allowed to stir for another 10 minutes at room temperature. The solvent was then removed under reduced pressure followed by a filtration to remove unreacted  $\text{KC}_8$ . UV-Vis-NIR spectra of the resulting solution was then recorded immediately. Further reaction of the doubly reduced species with excess TFA was also monitored by UV-Vis-NIR spectroscopy.

### **Spectroelectrochemistry:**

Spectro-electrochemical measurements were carried out in an optically transparent thin-layer electrochemical (OTTLE)<sup>[3]</sup> cell ( $\text{CaF}_2$  windows) with a platinum mesh working electrode, a platinum-mesh counter electrode, and a silver-foil pseudoreference electrode. Anhydrous and degassed DMF (99.8% extra dry, Sigma Aldrich) with 0.1 M  $\text{NBu}_4\text{PF}_6$  as the electrolyte was used as the solvent. The catalyst under investigation was dissolved into the 0.1 M  $\text{NBu}_4\text{PF}_6$  electrolyte solution and the OTTLE cell was then filled with 0.2 mL of the resulting solution and packed under Ar atmosphere. UV-Vis-NIR spectra of the *in-situ* generated species via



application of desired potential corresponding to the specified redox processes were recorded simultaneously under specified time interval.

### **Electron Paramagnetic Resonance:**

Electron Paramagnetic Resonance. EPR spectra at X-band frequency (ca. 9.5 GHz) were obtained with a Magnettech MS-5000 benchtop EPR spectrometer equipped with a rectangular TE 102 cavity and TC HO4 temperature controller. The measurements were performed in synthetic quartz glass tubes. Spectral simulations were performed using the EasySpin package<sup>[4]</sup> running in Matlab R2018b.

### **Density Functional Theory:**

All calculations were performed with the ORCA program package, versions 4.0.1.2 and 4.2.8<sup>[5]</sup> The geometries of all species were optimized using the PBE0 functional,<sup>[6]</sup> the def2-SVP basis sets on all atoms except for Cu, for which the def2-TZVP basis set was used.<sup>[7]</sup> Solvation was taken into account using the using the SMD method together with the CPCM model<sup>[8]</sup> using DMF as solvent, and dispersion corrections were included using the D3 dispersion correction model.<sup>[9]</sup> The resolution-of-the identity (RI) approximation,<sup>[10]</sup> with matching basis sets,<sup>[11]</sup> as well as the RIJCOSX approximation (combination of RI and chain-of-spheres algorithm for exchange integrals) were used to reduce the time of calculations. Numerical frequencies calculations were used in order to check that the optimized structures were local minima and to obtain Gibbs free enthalpies. To obtain more reliable energetics single-point calculations were performed using the optimized geometries, the PBE0 functional and def2-TZVP basis sets on all atoms. Low-lying excitation energies were calculated with time-dependent DFT (TD-DFT). For all calculations spin densities were calculated according to the Löwdin population analysis.<sup>[12]</sup> Broken-symmetry calculations<sup>[13]</sup> were carried out using optimized geometry to evaluate the exchange coupling constants. Plots of spin-densities and optimized geometries were performed using Chemcraft.<sup>[14]</sup>

## Overview of synthesis

Step -I: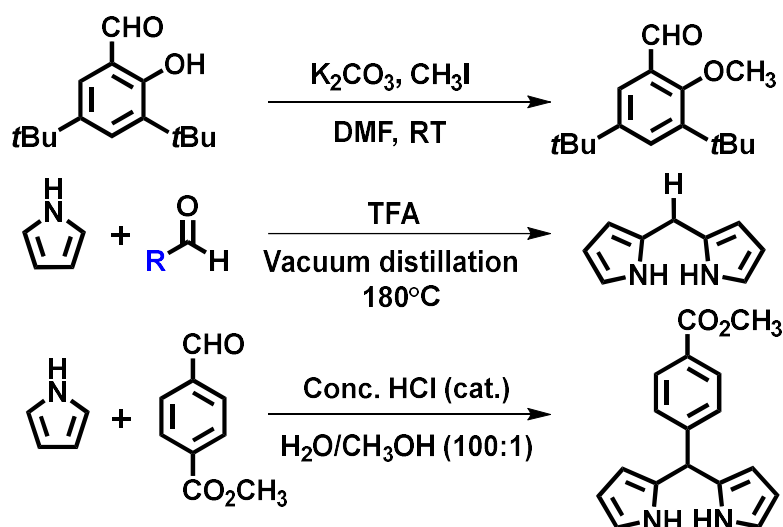Step -II: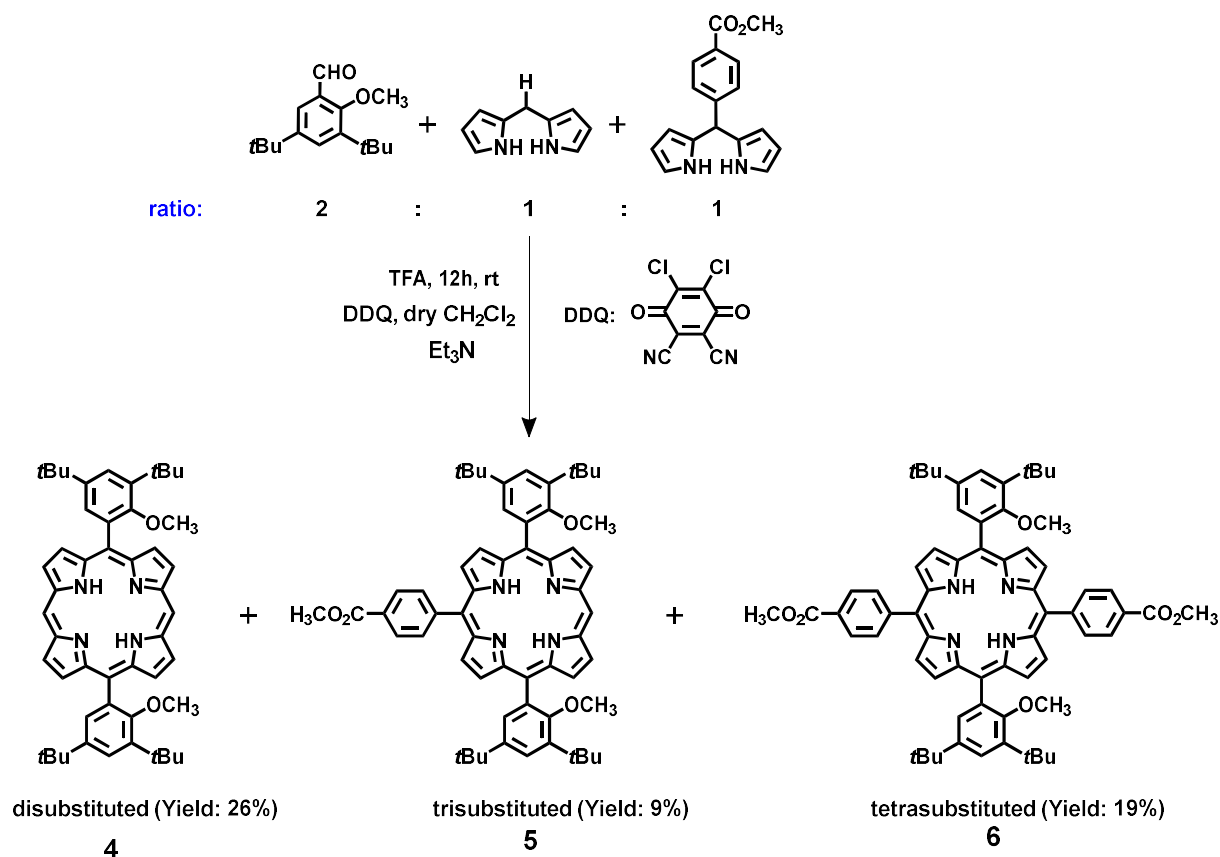

**Step-III**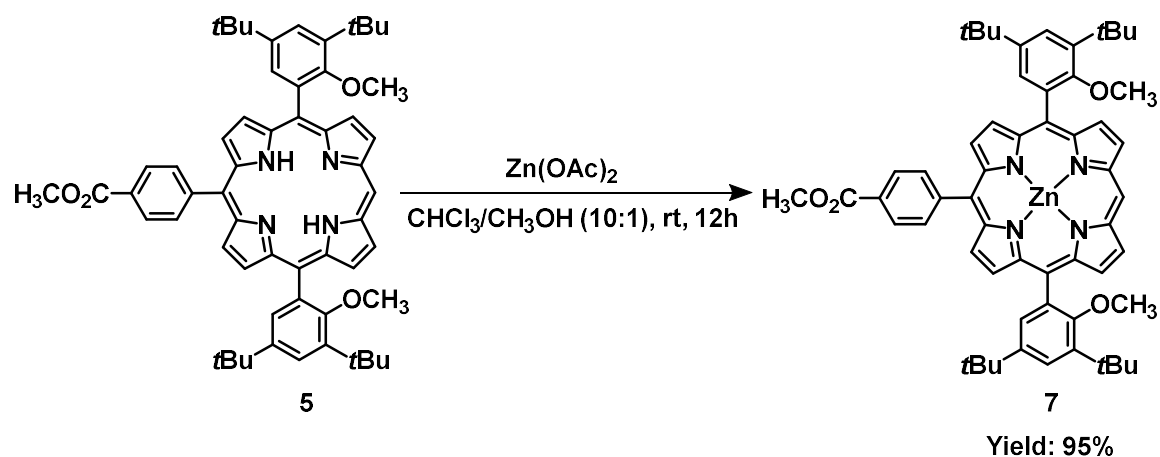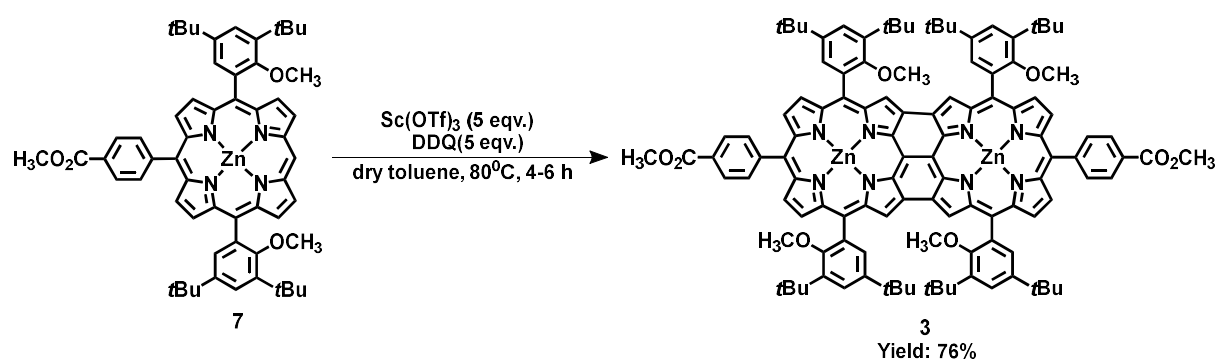**Step-IV**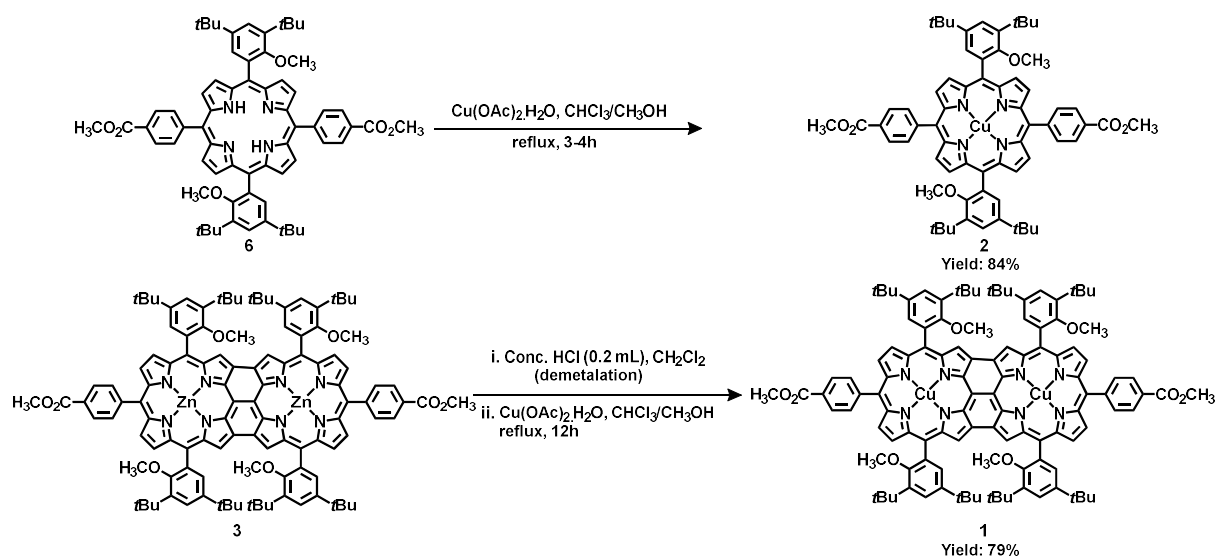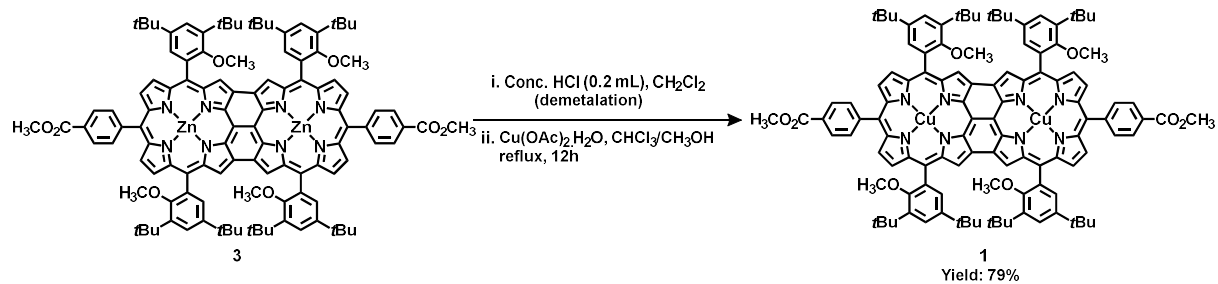

**Synthetic Procedure:**

Methyl 4-formylbenzoate were synthesized following a reported procedure,<sup>[15]</sup> by reacting 4-formylbenzoic acid (1.0 eq.) with methyl iodide (1.2 eq.) and K<sub>2</sub>CO<sub>3</sub> (1.0 eq.) in DMF at 60 °C for 2-4 hours. The reaction was quenched with H<sub>2</sub>O. The crude products were extracted with DCM, the organic phase was washed with H<sub>2</sub>O and dried over Na<sub>2</sub>SO<sub>4</sub>. Chromatographic purification in a small silica column (DCM) was performed to remove yellow impurities. The identity and purity of the product was confirmed by NMR.

3,5-di-tert-butyl-2-methoxybenzaldehyde,<sup>[16]</sup> Dipyrrromethane,<sup>[17]</sup> and 5-(4-methylcarboxyphenyl)-dipyrrromethane<sup>[18]</sup> was synthesized following the literature reported method. <sup>1</sup>H-NMR was in complete agreement with the published data.

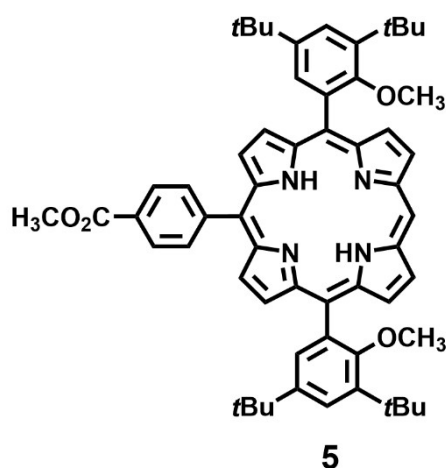

3,5-di-tert-butyl-2-methoxy benzaldehyde (1186 mg, 4.78 mmol), 5-(4-methylcarboxyphenyl)-dipyrrromethane (669 mg, 2.39 mmol) and dipyrrromethane (350 mg 2.39 mmol) were dissolved in DCM and degassed for 15 min. TFA (0.38 equiv) was added dropwise and the solution was stirred for overnight in the dark. DDQ (1.6 g, 3 equiv) was added and further stirred for three hours. The reaction was quenched with triethylamine and solvent was removed under reduced pressure. The crude product was purified by silica gel column chromatography and the desired product was eluted by using DCM/Hexane (1:1) solvent mixture. Second fraction was collected and removal of solvent yielded reddish-pink colored pure compound **5**.

[**5**]: Yield: 189 mg (9%), ESI-MS (M+H<sup>+</sup>): m/z = calc. for: C<sub>58</sub>H<sub>65</sub>N<sub>4</sub>O<sub>4</sub>; 881.5000, found: 881.4987, <sup>1</sup>H NMR (250 MHz, Chloroform-d) δ 10.20 (s, 1H), 9.34 (d, J = 4.6 Hz, 2H), 9.11 (d, J = 4.6 Hz, 2H), 9.00 (d, J = 4.7 Hz, 2H), 8.80 (d, J = 4.8 Hz, 2H), 8.43 (d, J = 8.1 Hz, 2H), 8.32 (d, J = 8.0 Hz, 2H), 7.86 (d, J = 2.4 Hz, 2H), 7.77 (d, J = 2.5 Hz, 2H), 4.11 (s, 3H), 2.58 (s, 6H), 1.68 (d, J = 6.5 Hz, 18H), 1.47 (p, J = 2.6 Hz, 18H).

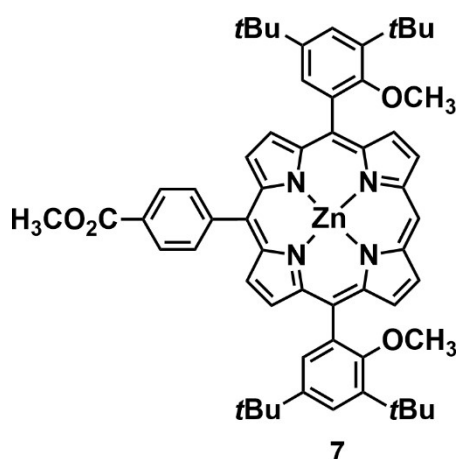

For Zn(II) metallation, a solution of  $\text{Zn}(\text{OAc})_2 \cdot 2\text{H}_2\text{O}$  (49 mg, 0.226 mmol) in MeOH was added to a solution of **5** (100 mg, 0.113 mmol) in  $\text{CHCl}_3$ , and the resulting mixture was stirred for 1 h. The progress of the reaction was monitored by TLC. After complete conversion was achieved, the mixture was poured into water, and was extracted with  $\text{CHCl}_3$ . The organic layer was separated, and the combined extracts were repeatedly washed with water and brine and dried over anhydrous  $\text{Na}_2\text{SO}_4$ . The solvent was removed and the residue was washed with MeOH to provide pure material **7** that can be used without further purification.

[**7**]: Yield: 106 mg (99%), ESI-MS ( $\text{M}+\text{H}^+$ ):  $m/z = \text{calc. for: } \text{C}_{58}\text{H}_{63}\text{N}_4\text{O}_4\text{Zn}$ ; 943.4135, found: 943.4131,  $^1\text{H NMR}$  (250 MHz, Chloroform- $d$ )  $\delta$  10.25 (s, 1H), 9.42 (d,  $J = 4.4$  Hz, 2H), 9.20 (dd,  $J = 4.5, 2.0$  Hz, 2H), 9.09 (dd,  $J = 4.7, 1.5$  Hz, 2H), 8.90 (d,  $J = 4.7$  Hz, 2H), 8.46 – 8.16 (m, 4H), 7.93 (dd,  $J = 15.3, 2.4$  Hz, 2H), 7.81 – 7.73 (m, 2H), 4.10 (s, 3H), 2.50 (d,  $J = 3.0$  Hz, 6H), 1.66 (s, 18H), 1.48 (dd,  $J = 3.5, 1.1$  Hz, 18H).

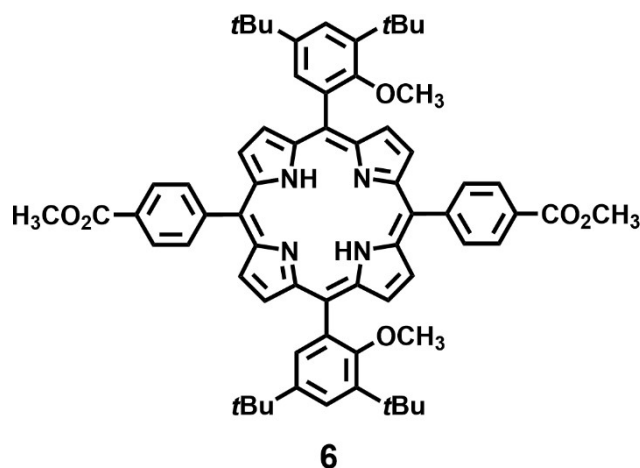

3,5-di-tert-butyl-2-methoxy benzaldehyde (1186 mg, 4.78 mmol), 5-(4-methylcarboxyphenyl)-dipyrromethane (669 mg, 2.39 mmol) and dipyrromethane (350 mg, 2.39 mmol) were dissolved in DCM and degassed for 15 min. TFA (0.38 equiv) was added dropwise and the solution was stirred for overnight in the dark. DDQ (1.6 g, 3 equiv) was added and the reaction mixture was allowed to stir for three hours. The reaction was quenched with triethylamine and the solvent was removed under reduced pressure. The crude product was purified via silica gel column chromatography. The desired product was eluted with DCM/Hexane solvent mixture (4:1 to pure DCM). Third fraction was collected and solvent was removed under reduced pressure. Crystallization of the compound from chloroform/methanol mixture resulted in red colored pure compound **6**.

[**6**]: Yield: 218 mg (19%), ESI-MS ( $M+H^+$ ):  $m/z$  = calc. for:  $C_{66}H_{71}N_4O_6$ ; 1015.5368, found: 1015.5351,  $^1H$  NMR (250 MHz, Chloroform- $d$ )  $\delta$  8.89 (d,  $J$  = 4.6 Hz, 3H), 8.72 (d,  $J$  = 5.5 Hz, 4H), 8.43 – 8.13 (m, 8H), 7.85 (d,  $J$  = 2.4 Hz, 1H), 7.80 (d,  $J$  = 2.3 Hz, 1H), 7.74 (d,  $J$  = 2.7 Hz, 1H), 7.68 (d,  $J$  = 2.5 Hz, 2H), 4.04 (s, 6H), 2.65 – 2.36 (m, 6H), 1.66 – 1.36 (m, 38H). -2.72 (s, 2H).

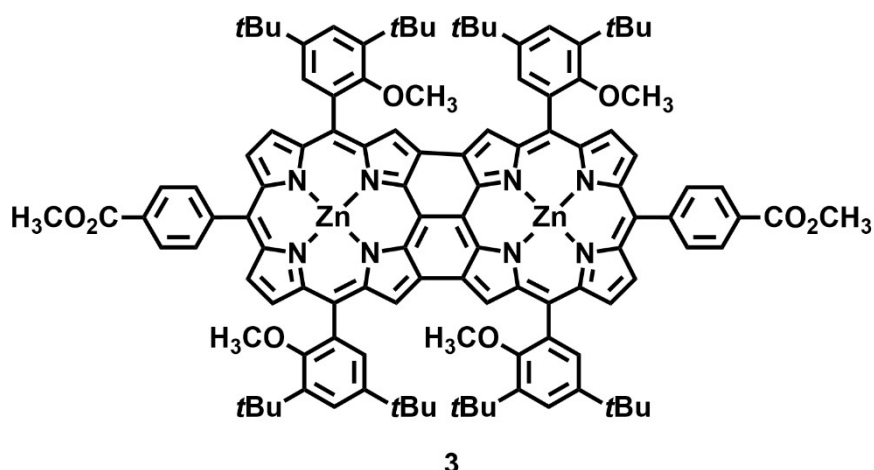

A 100 mL Schlenk tube was charged with metalloporphyrin **7** (50 mg, 0.052 mmol) followed by an addition of dry toluene. The solution was degassed by three freeze–pump–thaw cycles. DDQ (0.26 mmol) and Sc(OTf)<sub>3</sub> (0.26 mmol) were added, and the reaction was heated to 50 °C under argon for 4–6 h. THF was then added and the reaction was stirred at room temperature for further 1 h. The reaction mixture was then passed through a short plug of alumina with CH<sub>2</sub>Cl<sub>2</sub> and then CH<sub>2</sub>Cl<sub>2</sub>: THF (1:1) as eluents. The solvent was removed in vacuo, and the residue was purified via silica gel column chromatography by using DCM/THF (90:1) solvent mixture as a eluant. Removal of solvent under reduced pressure followed by a recrystallization from chloroform/methanol yielded the desired triply fused dimer **3**.

[**3**]: Yield: 38 mg (76%), ESI-MS (M<sup>+</sup>): m/z = calc. for: C<sub>116</sub>H<sub>118</sub>Zn<sub>2</sub>N<sub>8</sub>O<sub>8</sub>; 1882.7649, found: 1882.7640, <sup>1</sup>H NMR (250 MHz, Chloroform-d) δ 8.19 – 8.13 (m, 4H), 7.90 – 7.73 (m, 4H), 7.63 (qd, J = 4.6, 1.3 Hz, 4H), 7.57 – 7.52 (m, 4H), 7.49 (d, J = 2.6 Hz, 4H), 7.44 (t, J = 2.6 Hz, 2H), 7.39 (t, J = 2.2 Hz, 2H), 7.36 – 7.32 (m, 2H), 7.30 (d, J = 5.0 Hz, 2H), 3.95 (s, 6H), 3.18 – 2.90 (m, 12H), 1.46 – 1.28 (m, 72H).

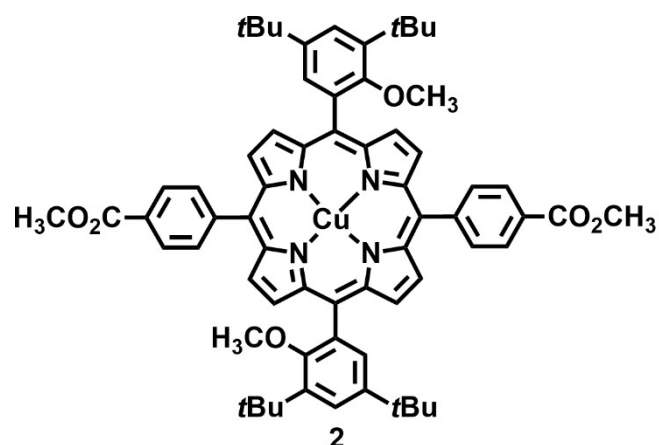

For Cu(II) metallation, a solution of Cu(OAc)<sub>2</sub> (14 mg, 0.073 mmol) in MeOH was added to a solution of **6** (50 mg, 0.049 mmol) in CHCl<sub>3</sub>, and the resulting mixture was stirred for 1 h. After the complete metalation was confirmed by TLC, the mixture was poured into water, and the porphyrin products were extracted with CHCl<sub>3</sub>. The organic layer was separated, and the combined extracts were washed with water and brine and dried over anhydrous Na<sub>2</sub>SO<sub>4</sub>. The solvent was removed and the residue was purified by silica gel column chromatography. The desired red colored pure product was eluted by DCM/hexane (1:1) solvent mixture followed by a recrystallization from chloroform/methanol yielded pure **2**.

[**2**]: Yield: 45 mg (84%), ESI-MS: *m/z* = calc. for: C<sub>66</sub>H<sub>68</sub>CuN<sub>4</sub>O<sub>6</sub> 1076.4508; found: 1076.4503, UV-Vis λ<sub>max</sub>: 417, 536 nm.



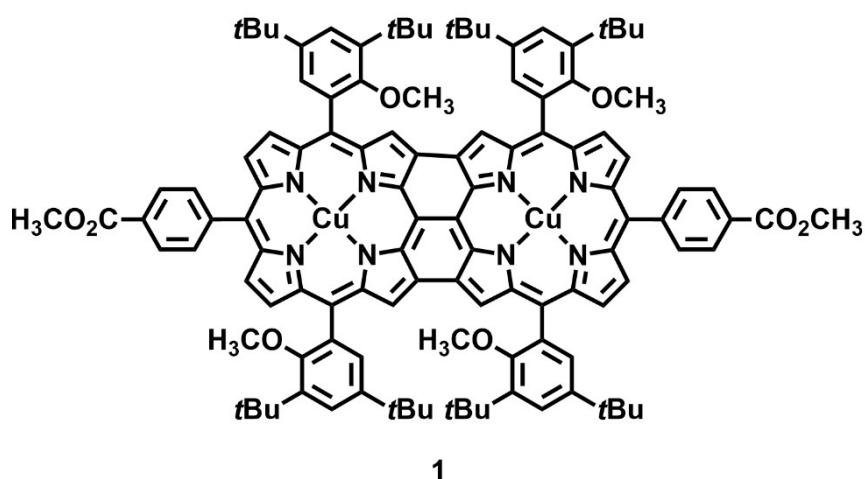

Fused zinc porphyrin dimer **3** (50 mg, 0.026 mmol) was dissolved in dichloromethane (10 ml), conc. hydrochloric acid (0.2 ml) was added and the reaction mixture was vigorously stirred for 15 min. Reaction mixture was then quenched with water and extracted with mixture of DCM and saturated NaHCO<sub>3</sub> three times. The organic layer was then collected and solvent was removed in vacuum. The product obtained was used without further purification for metalation. For Cu(II) metallation, a saturated solution of Cu(OAc)<sub>2</sub> in MeOH was added to a solution of free base fused porphyrin in CHCl<sub>3</sub>, and the resulting mixture was refluxed for overnight. After the complete metallation was confirmed by TLC, the mixture was poured into water, and the porphyrin products were extracted with CHCl<sub>3</sub>. The organic layer was separated, and the combined extracts were washed with water, brine solution and dried over anhydrous Na<sub>2</sub>SO<sub>4</sub>. The solvent was removed and the residue was purified via silica gel column chromatography. Purification on a silica gel (60M) column by using DCM/hexane (7:3) solvent mixture as the eluent resulted in the isolation of violet colored pure compound. Removal of solvent followed by a crystallization from the mixture of DCM and methanol yielded pure complex **1**.

[**1**]: Yield: 39 mg (79%), ESI-MS:  $m/z$  = calc. for: C<sub>116</sub>H<sub>118</sub>Cu<sub>2</sub>N<sub>8</sub>O<sub>8</sub>; 1876.7659 found: 1876.7662, UV-Vis (DCM)  $\lambda_{\text{max}}$ : 414, 576, 887, 986nm.

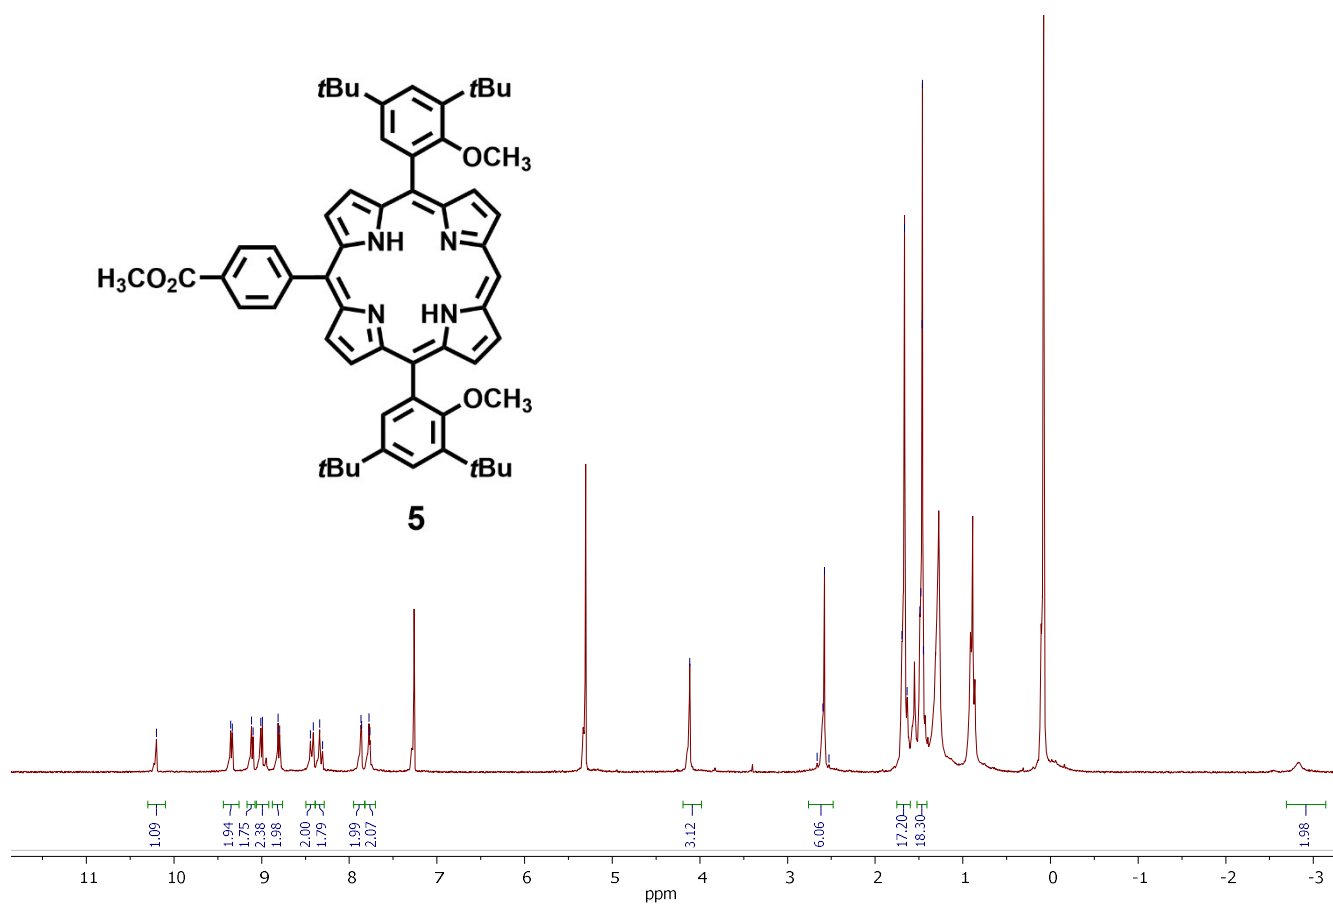

**Figure S1.**  $^1\text{H}$  NMR (250 MHz,  $\text{CDCl}_3$ ) of porphyrin **5**.

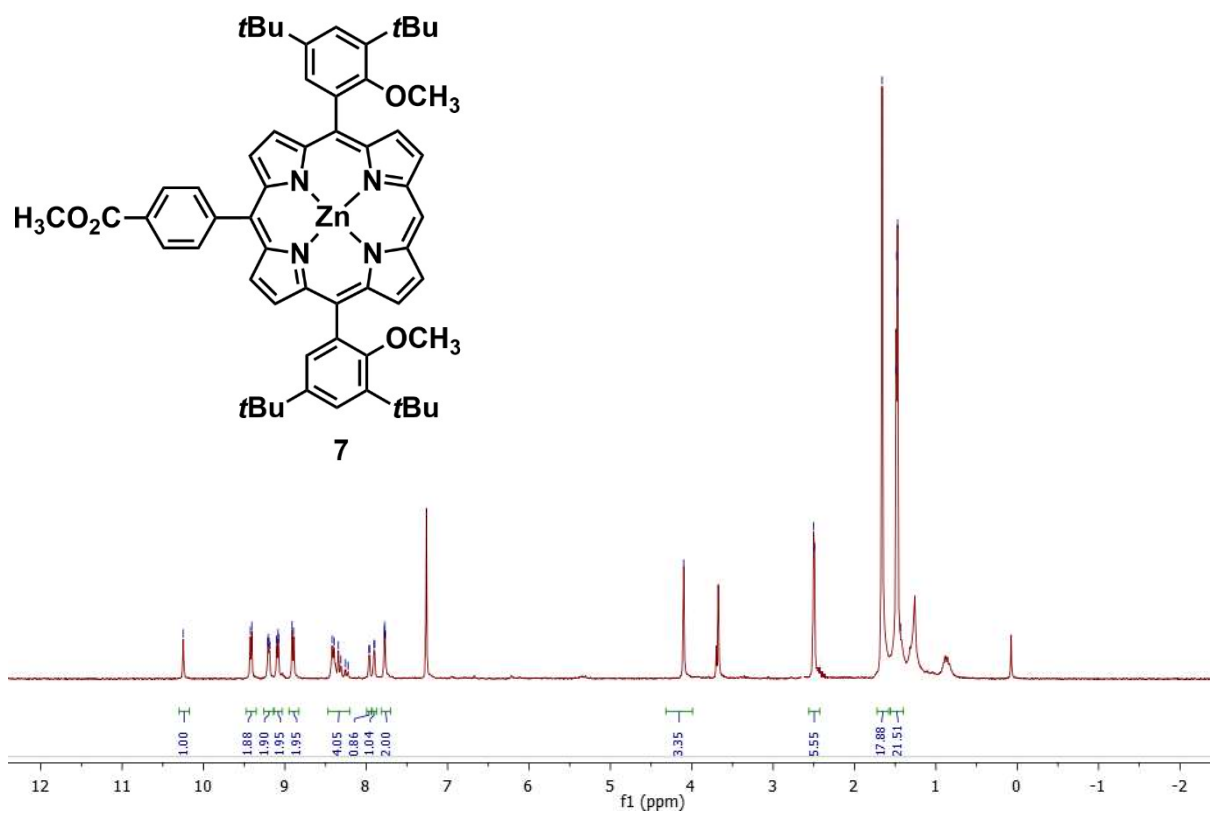

**Figure S2.** <sup>1</sup>H NMR (250 MHz, CDCl<sub>3</sub>) of porphyrin 7.

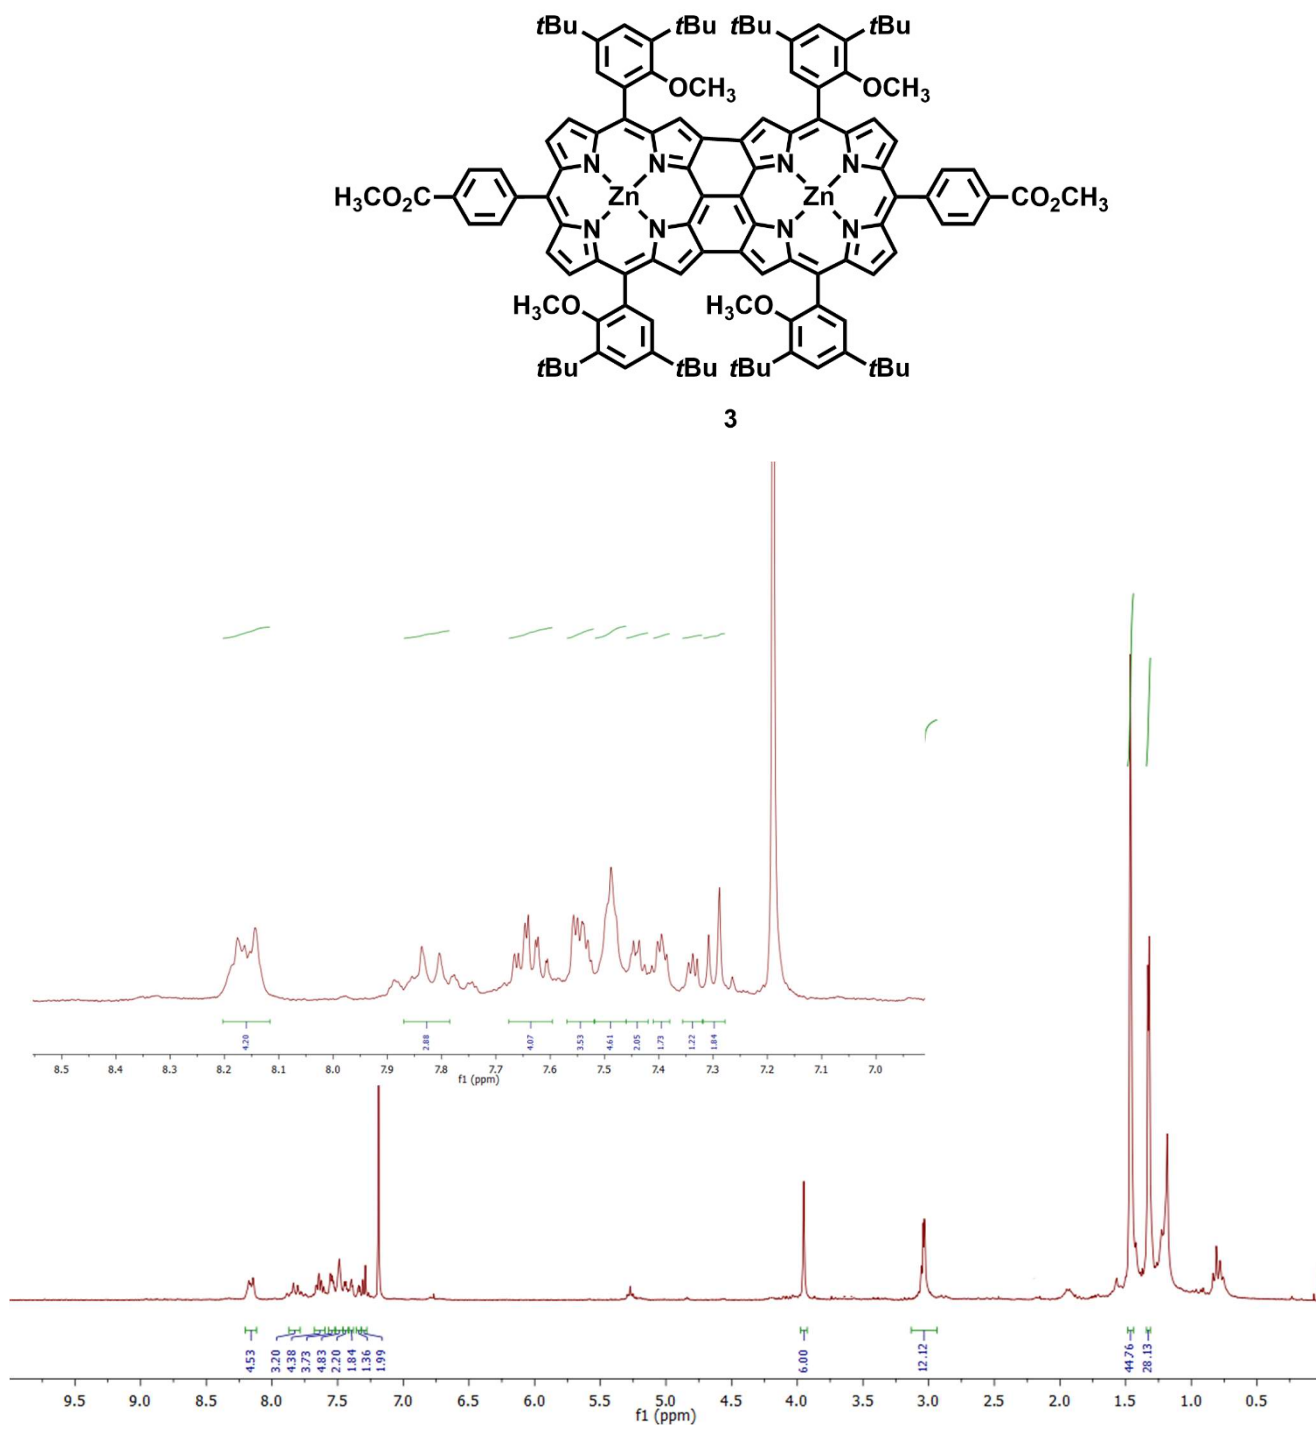

**Figure S3.** <sup>1</sup>H NMR (250 MHz, CDCl<sub>3</sub>) of porphyrin **3**.

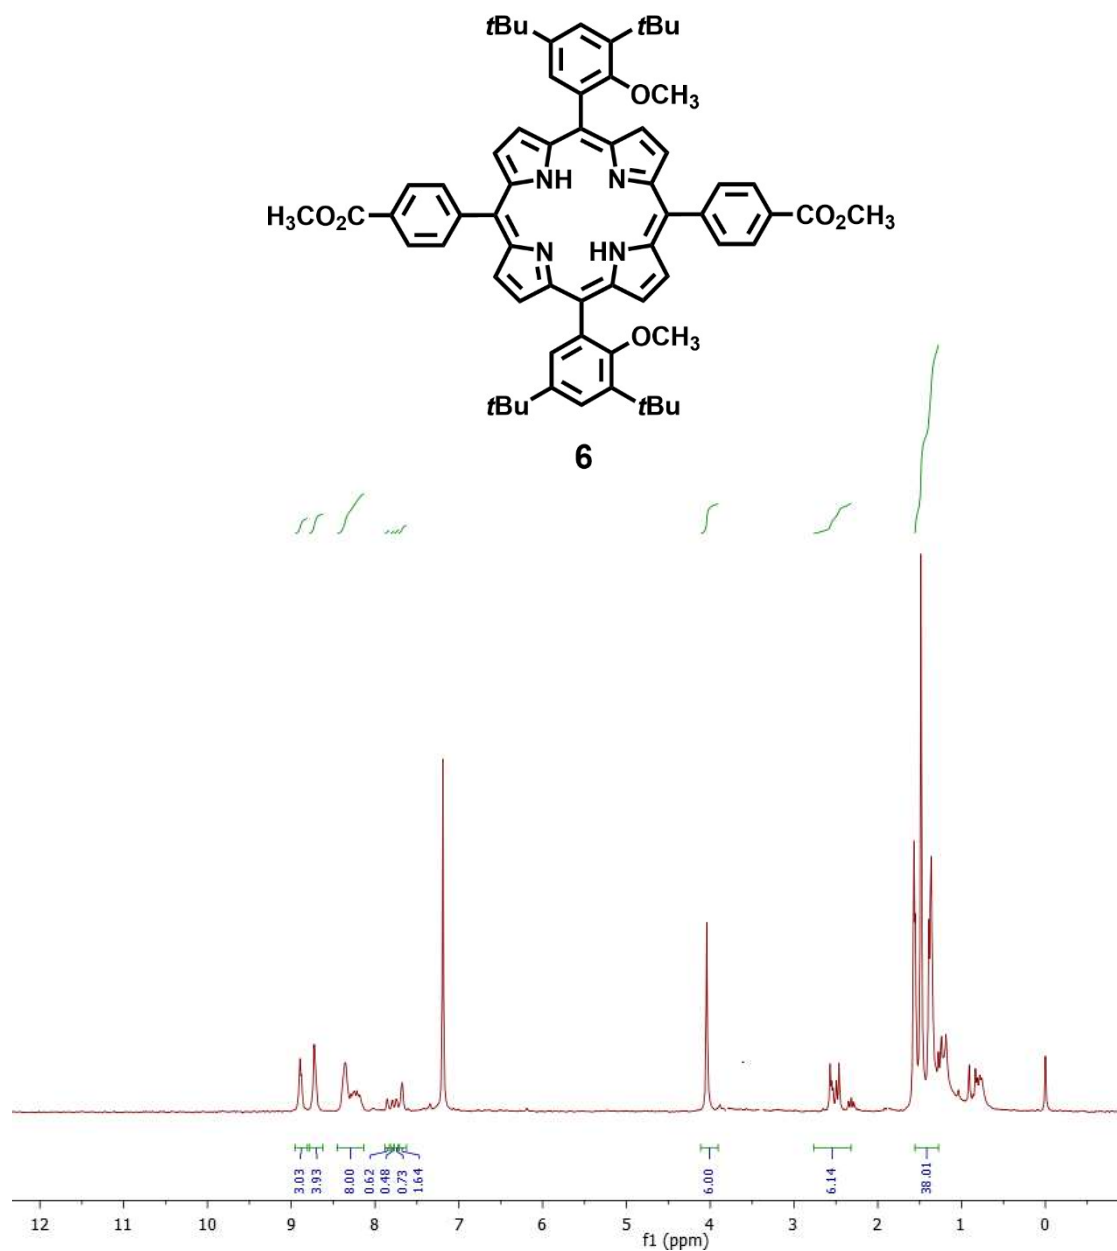

**Figure S4.** <sup>1</sup>H NMR (250 MHz, CDCl<sub>3</sub>) of porphyrin **6**.

# SUPPORTING INFORMATION

## Acquisition Parameter

|             |            |                       |           |                  |           |
|-------------|------------|-----------------------|-----------|------------------|-----------|
| Source Type | ESI        | Ion Polarity          | Positive  | Set Nebulizer    | 0.4 Bar   |
| Focus       | Not active | Set Capillary         | 4500 V    | Set Dry Heater   | 200 °C    |
| Scan Begin  | 250 m/z    | Set End Plate Offset  | -500 V    | Set Dry Gas      | 4.0 l/min |
| Scan End    | 3000 m/z   | Set Collision Cell RF | 500.0 Vpp | Set Divert Valve | Waste     |

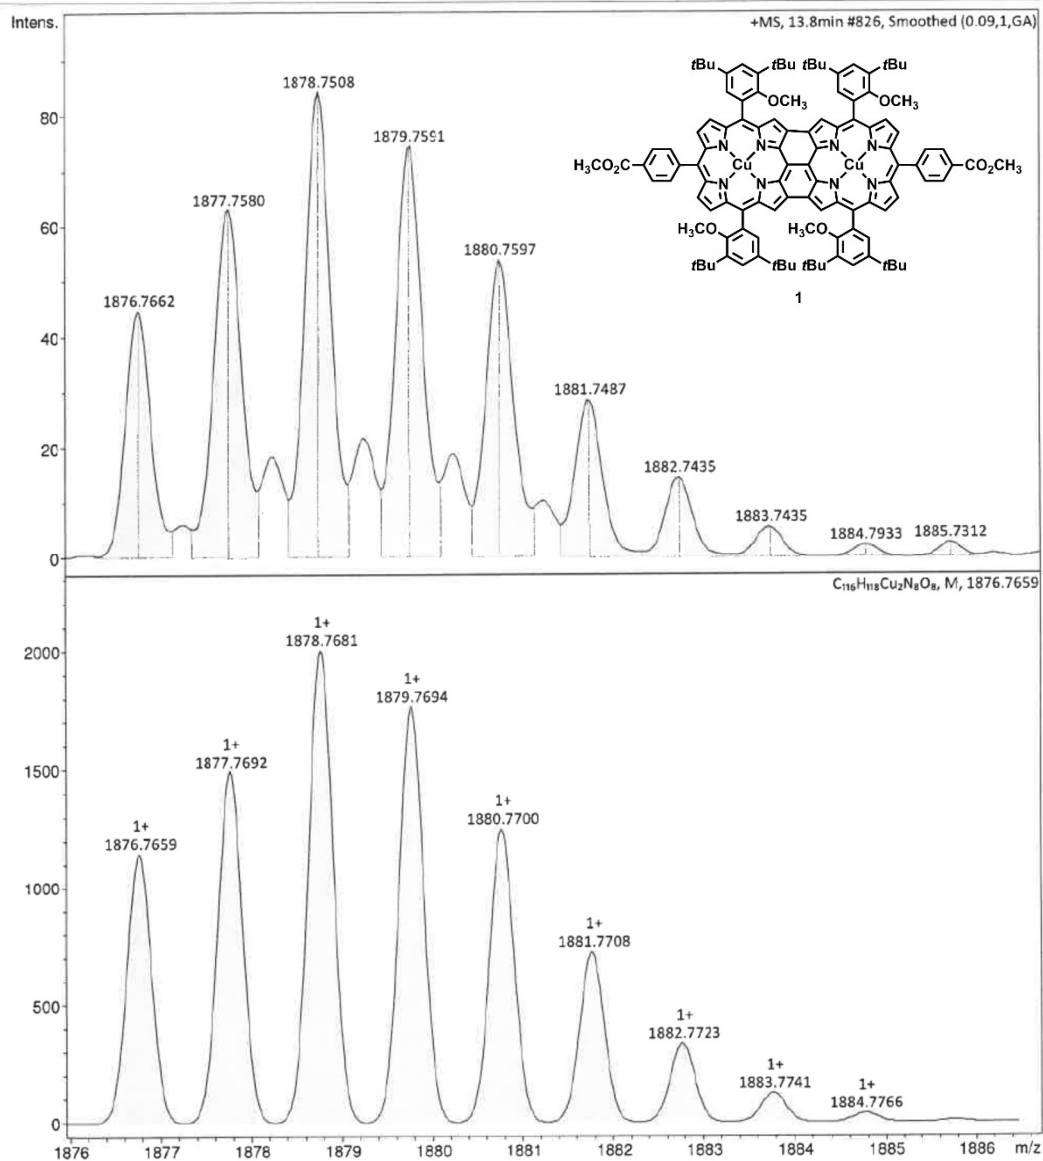

Bruker Compass DataAnalysis 4.2

printed: 5/27/2020 5:05:47 PM

Page 1 of 1

**Figure S5.** High resolution (ESI-MS) mass spectrum of **1** in dichloromethane.

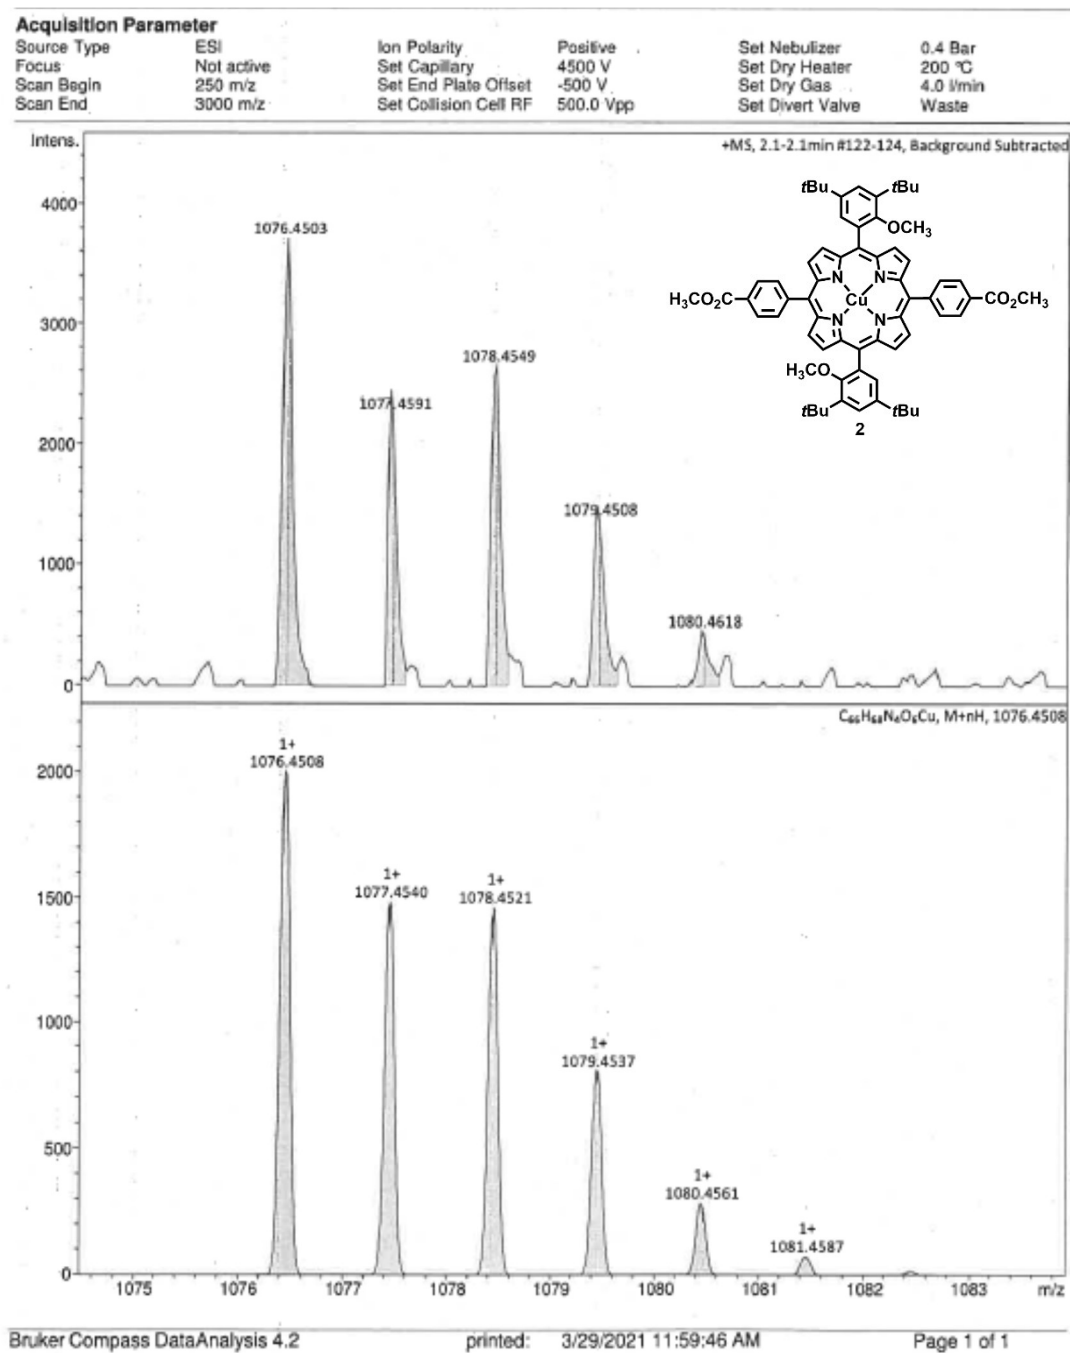

**Figure S6.** High resolution (ESI-MS) mass spectrum of **2** in dichloromethane.

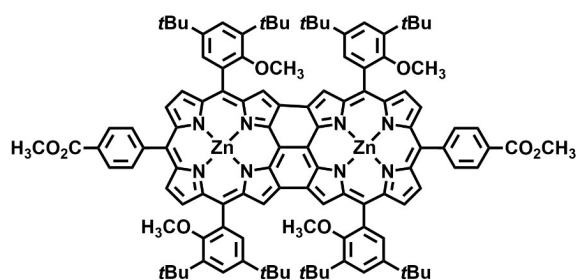

D:\2022\...\Hazari-ASH120-Zn2TF\_242  
ESI am Exactive Plus

07/29/22 09:36:09

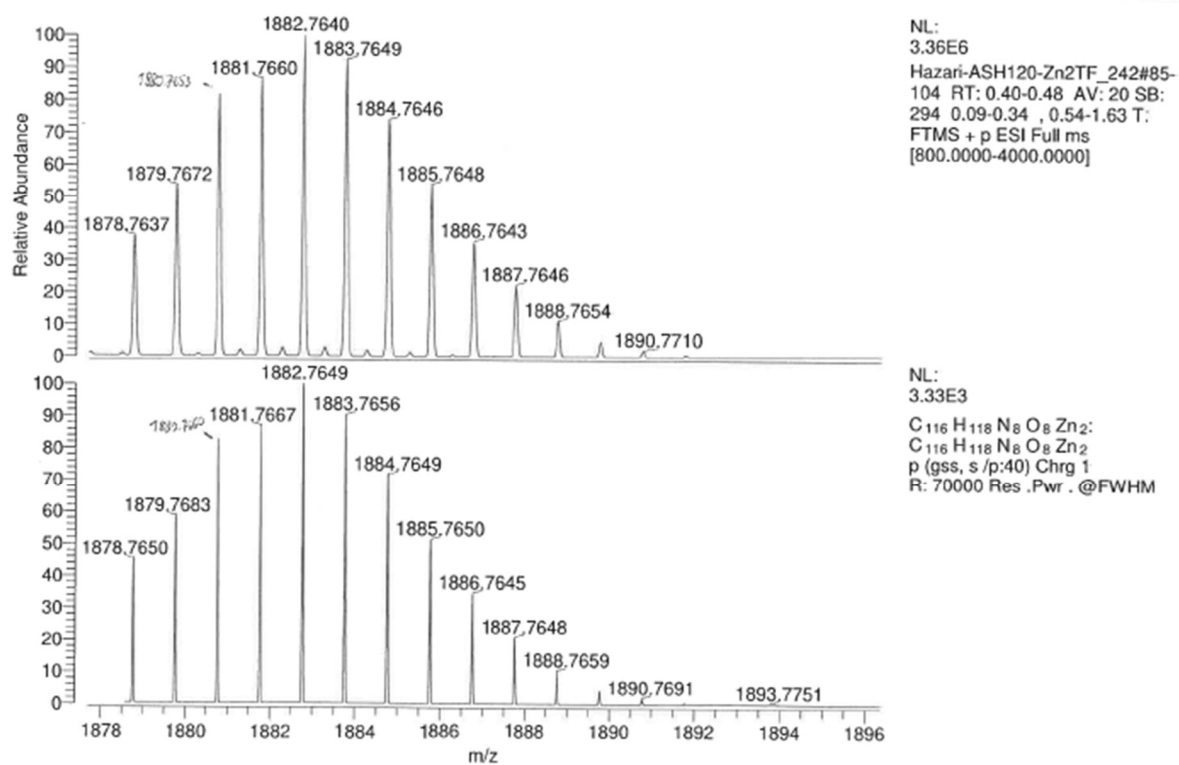

**Figure S7.** High resolution (ESI-MS) mass spectrum of **3** in dichloromethane.



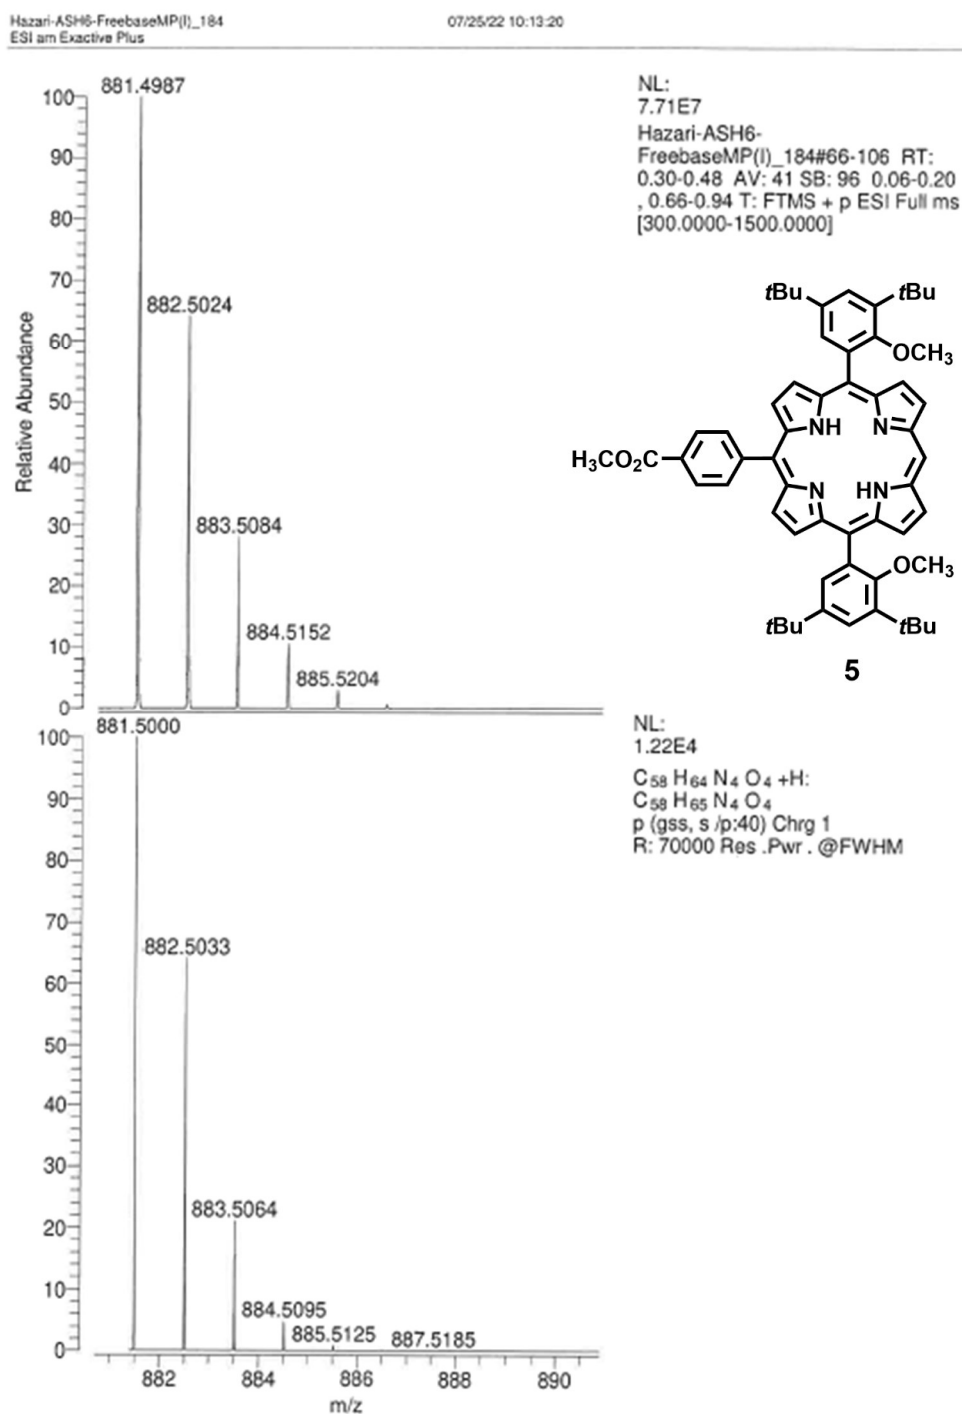

**Figure S8.** High resolution (ESI-MS) mass spectrum of **5** in dichloromethane.

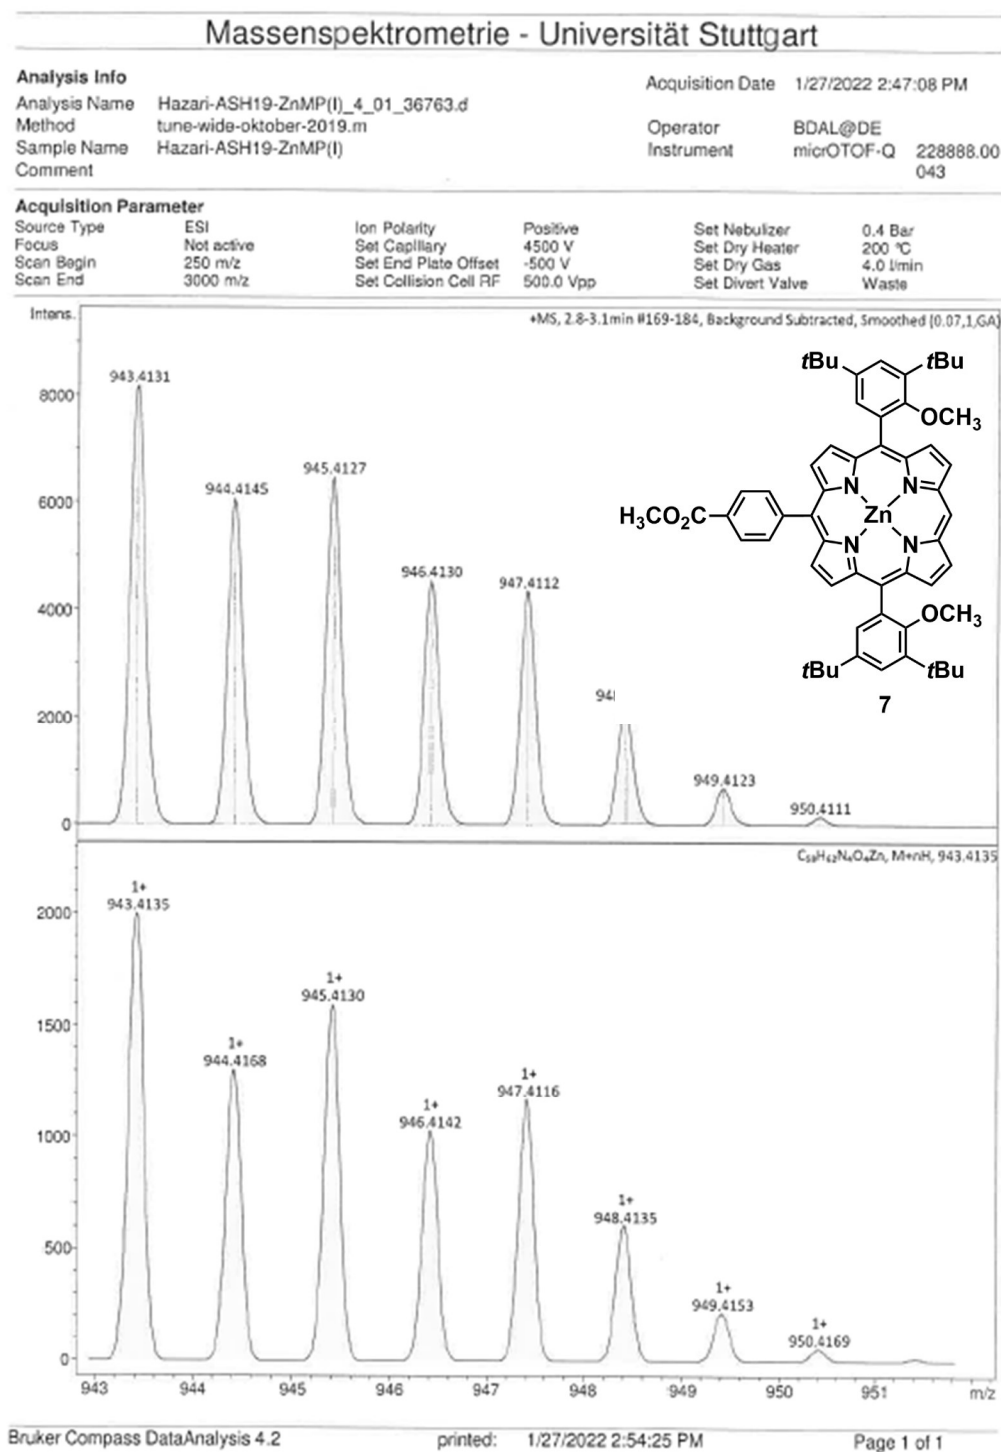

**Figure S9.** High resolution (ESI-MS) mass spectrum of **7** in dichloromethane.

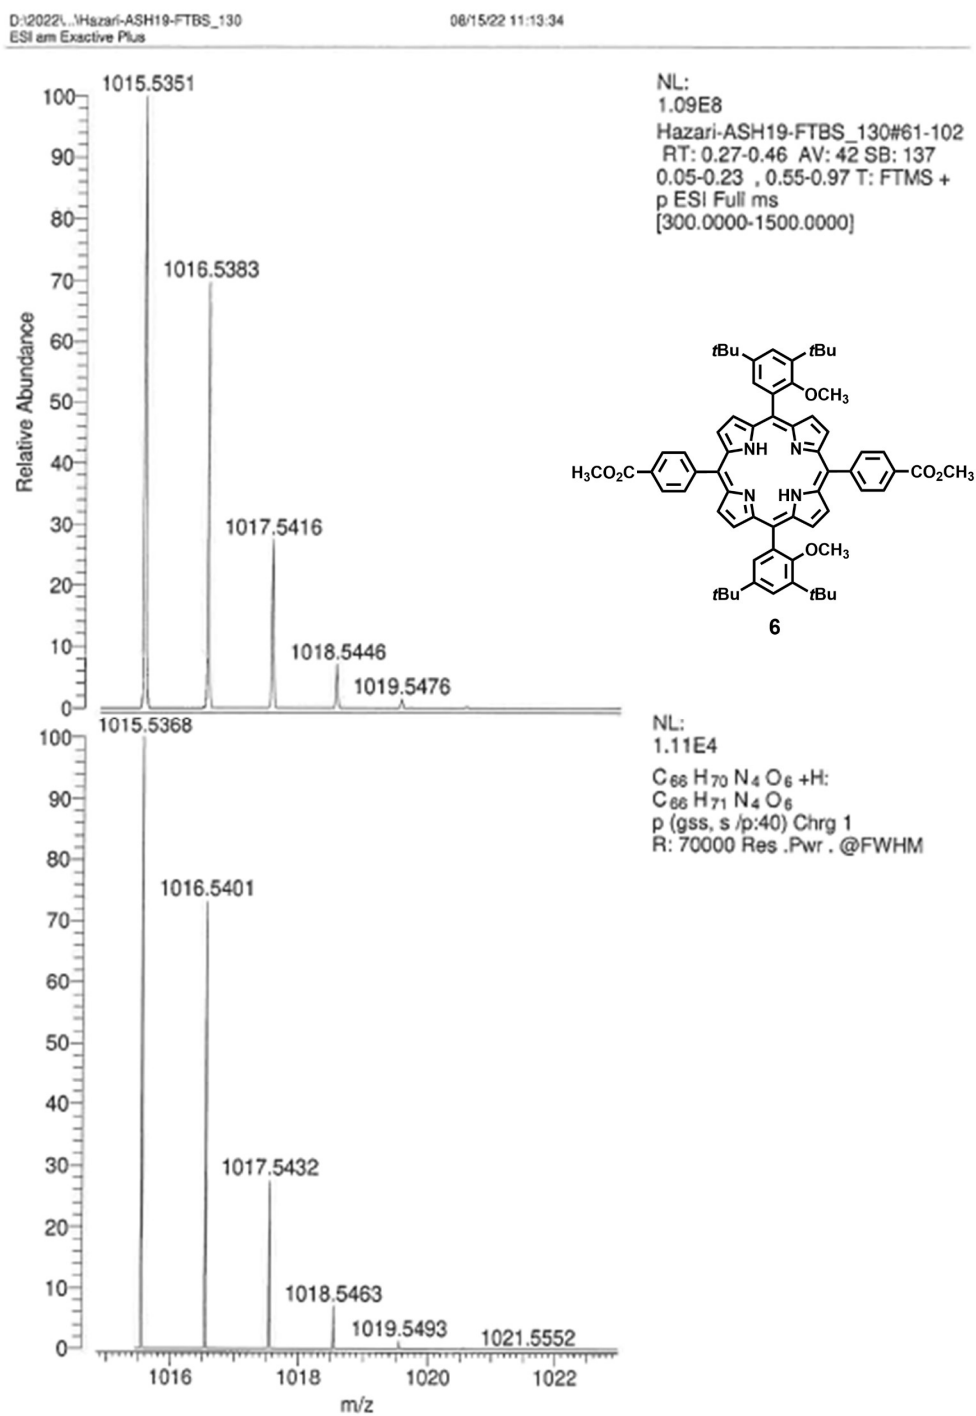

**Figure S10.** High resolution (ESI-MS) mass spectrum of **6** in dichloromethane.

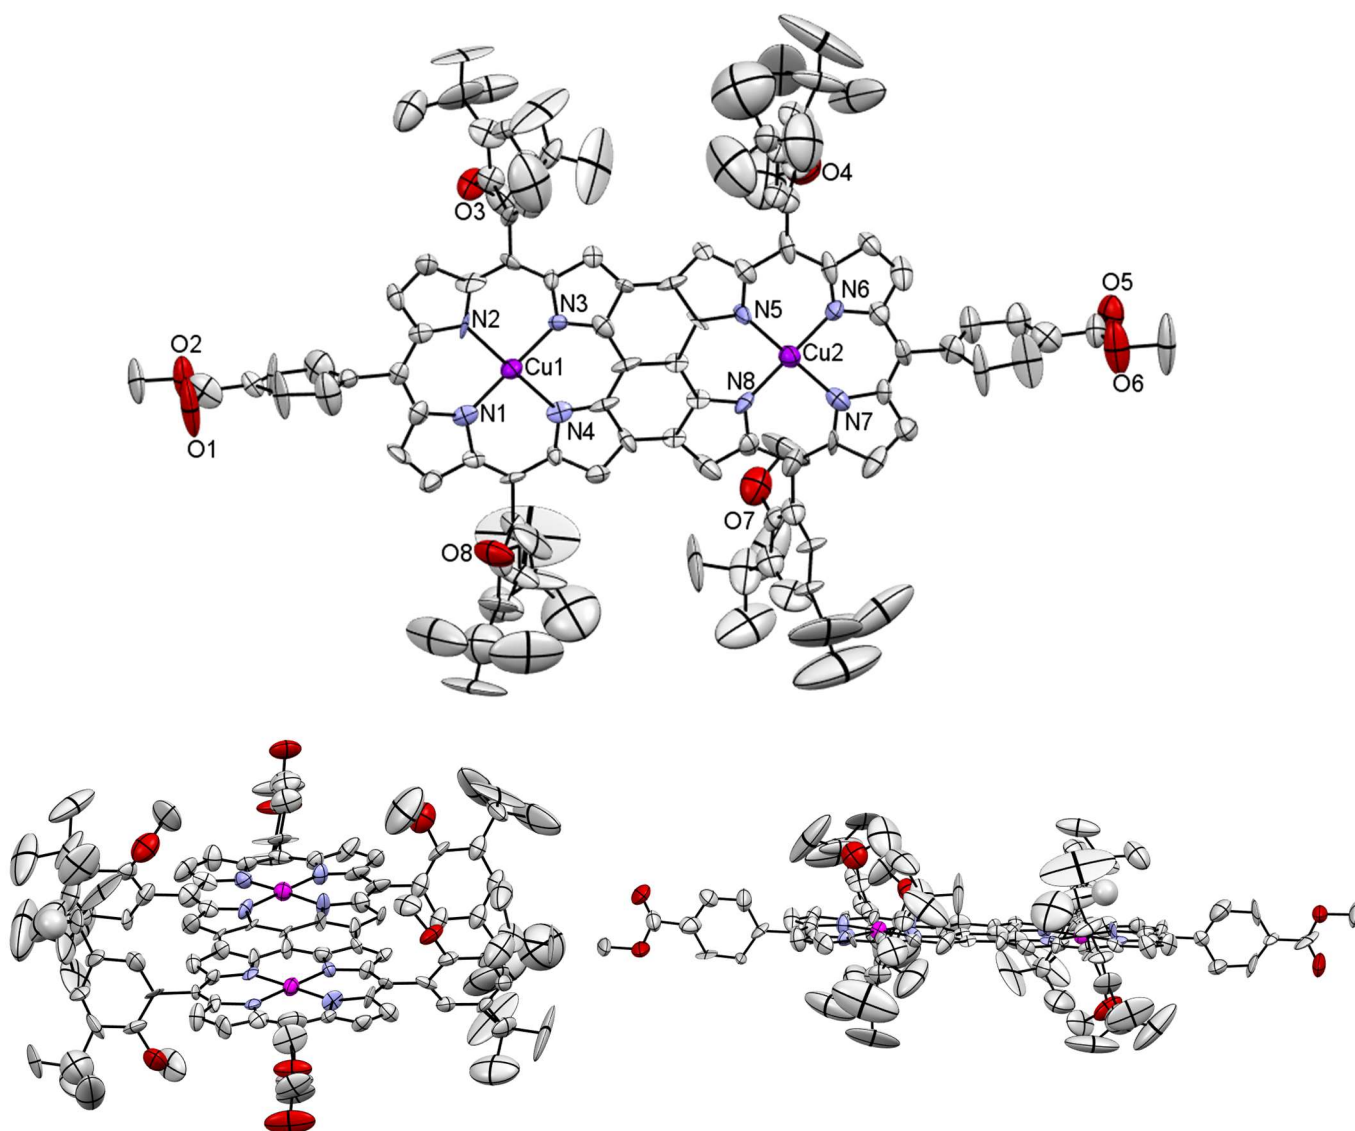

**Figure S11.** Ortep representation of **1**. Ellipsoids are drawn at 50% probability level. Hydrogen atoms have been omitted for clarity. Diagram below depicts side views of the crystal structure of **1**.

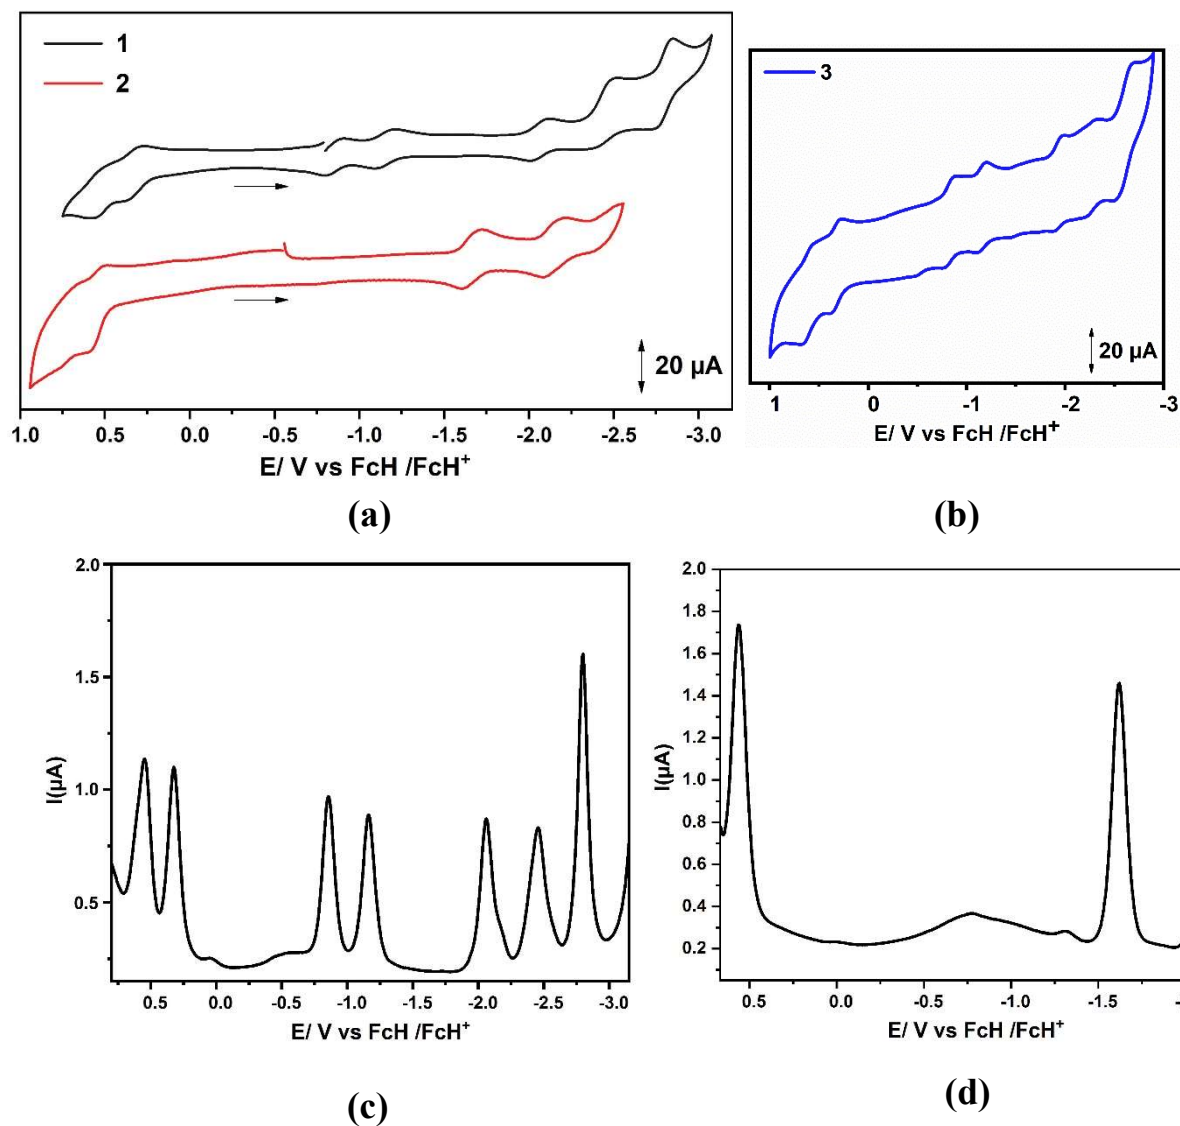

**Figure S12.** Cyclic voltammograms of 0.25 mM of (a) bimetallic copper fused porphyrin (1), copper monomer (2), and (b) Zn-fused porphyrin in DMF with 0.1 M  $n\text{Bu}_4\text{PF}_6$  at 100 mV/S. Differential pulse voltammograms of 0.25 mM of (c) bimetallic copper fused porphyrin (1), and (d) copper monomer (2).

## SUPPORTING INFORMATION

---

**Table S1.** Electrochemical Data obtained from Cyclic Voltammetry<sup>a</sup>.

| Complex  | $E/[V](\Delta E_p/[mV])^b$ |           |            |            |            |            |            |
|----------|----------------------------|-----------|------------|------------|------------|------------|------------|
|          | $E_{ox2}$                  | $E_{ox1}$ | $E_{red1}$ | $E_{red2}$ | $E_{red3}$ | $E_{red4}$ | $E_{red5}$ |
| <b>1</b> | 0.56 (30)                  | 0.30 (65) | -0.85 (90) | -1.15 (95) | -2.05 (88) | -2.45 (90) | -2.80 (88) |
| <b>2</b> | -                          | 0.56 (60) | -1.65 (91) | -2.12 (86) | -          | -          | -          |
| <b>3</b> | 0.62 (80)                  | 0.31 (70) | -0.81 (72) | -1.16 (79) | -1.92 (59) | -2.27 (97) | -2.59 (97) |

<sup>a</sup>measured in DMF with 0.1 M <sup>n</sup>Bu<sub>4</sub>PF<sub>6</sub> at 100 mV/S. <sup>b</sup>Potentials in V versus Fc/FcH<sup>+</sup>; peak potential differences  $\Delta E_p/mV$  in parentheses.

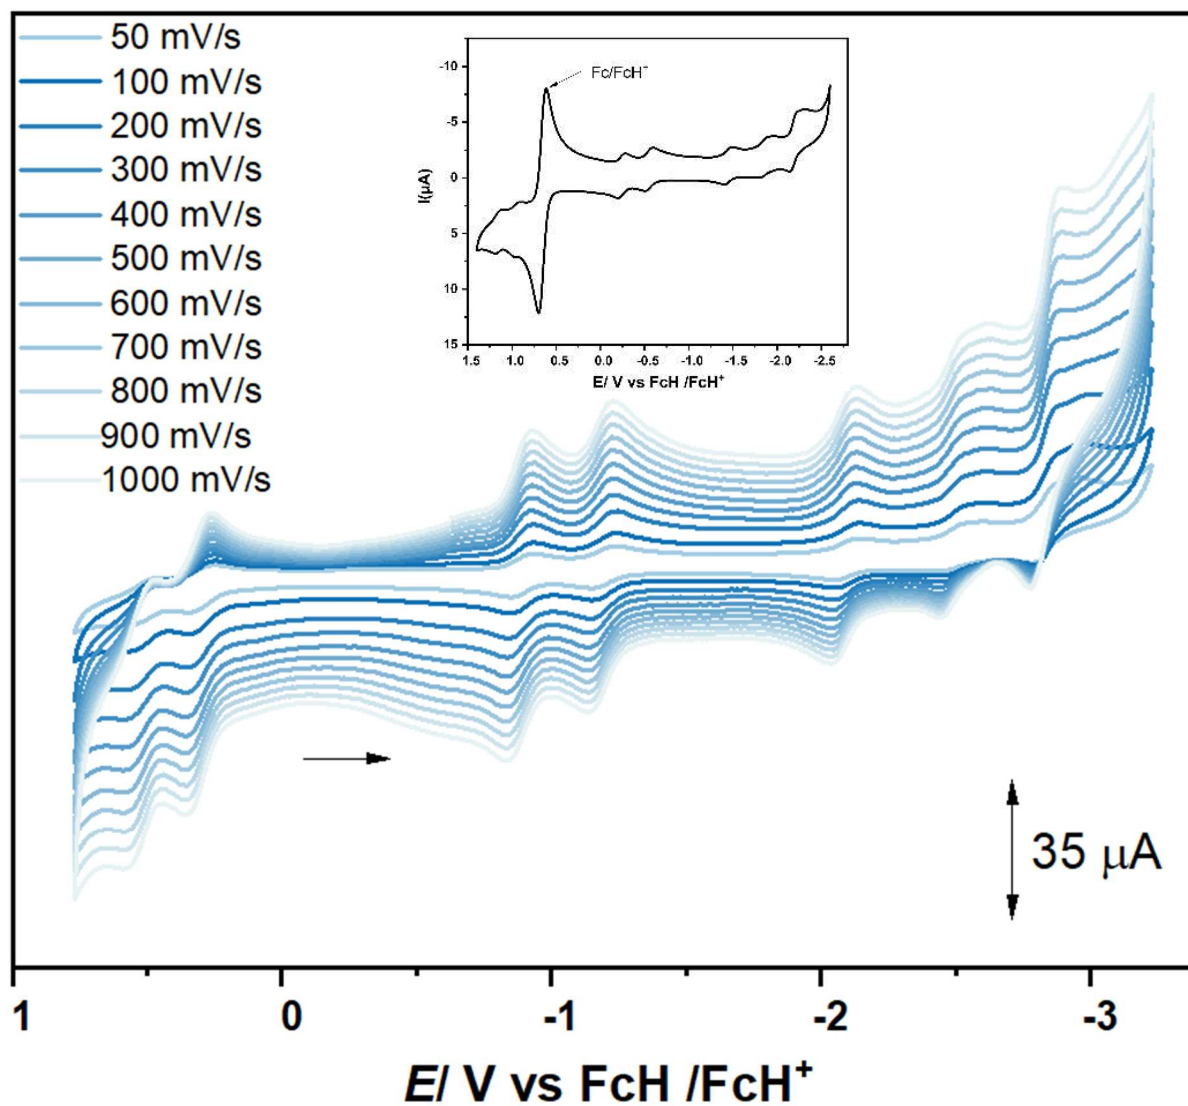

**Figure S13.** Cyclic voltammograms of 1 in DMF containing 0.1M  $n\text{Bu}_4\text{PF}_6$  at different scan rates. (Conditions: GC working electrode, platinum wire as a counter electrode, and  $\text{Fc}/\text{FcH}^+$  couple ( $E_{1/2} = 0.63$  v, inset, recorded at a scan rate of 100mV/s) as an internal reference.

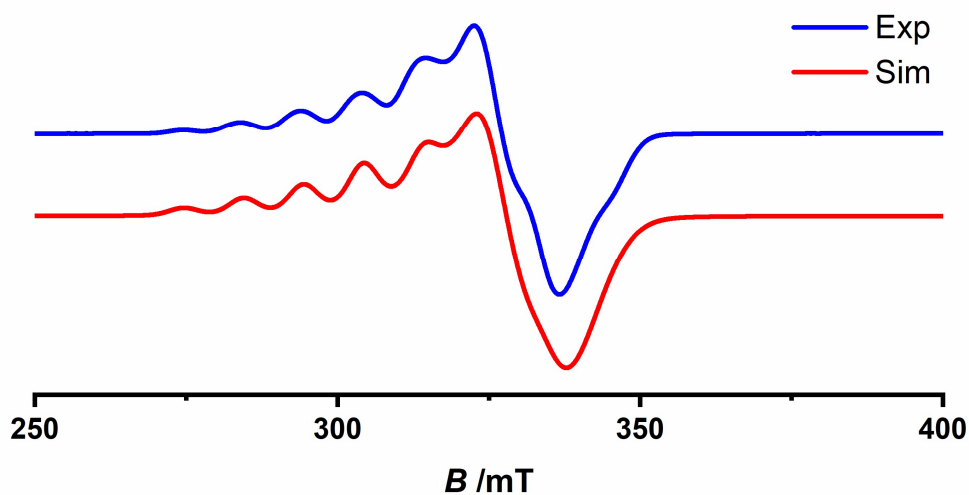

**Figure S14.** Experimental (blue) and simulated (red) X-band (9.47 GHz) EPR spectra of **1** measured at 98K.

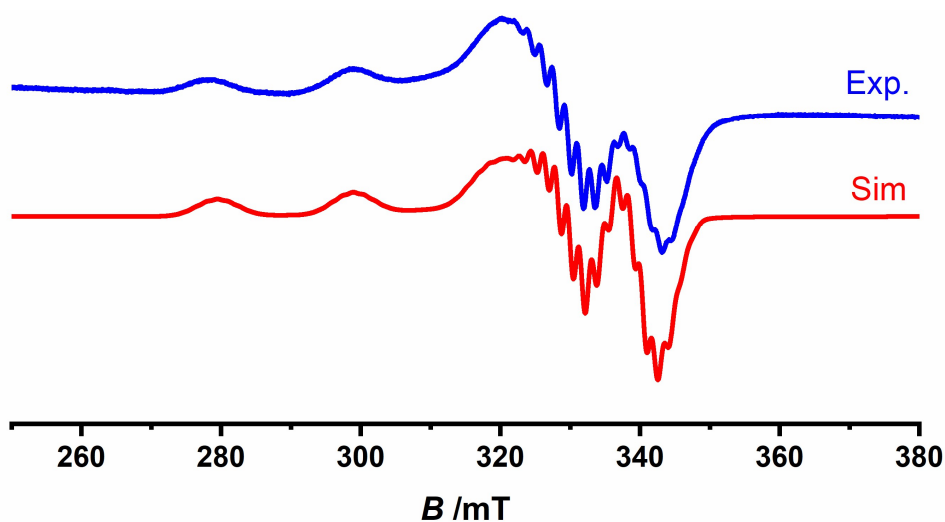

**Figure S15.** Experimental (blue) and simulated (red) X-band (9.47 GHz) EPR spectra of complex **2** measured at 98 K.



## SUPPORTING INFORMATION

---

**Table S2.** EPR parameters obtained from the least-squares fitting of the simulated EPR spectra with experimental spectra.

| Parameters                                                                                            | <b>1 (<math>S = 1</math>)</b> | <b>2 (<math>S = 1/2</math>)</b> |
|-------------------------------------------------------------------------------------------------------|-------------------------------|---------------------------------|
| $g_x$                                                                                                 | 2.0729                        | 2.043                           |
| $g_y$                                                                                                 | 2.0098                        | 2.045                           |
| $g_z$                                                                                                 | 2.2210                        | 2.19                            |
| $A_x$ (MHz)                                                                                           | 20                            | 64                              |
| $A_y$ (MHz)                                                                                           | 20                            | 61                              |
| $A_z$ (MHz)                                                                                           | 308                           | 596                             |
| $lwpp$ (mT) <sup>a</sup>                                                                              | 0 0.7527                      | 1.3 0.3                         |
| $HStrain_x$                                                                                           | 270.8825                      | 20                              |
| $HStrain_y$                                                                                           | 314.3718                      | 2                               |
| $HStrain_z$                                                                                           | 153.1062                      | 20                              |
| Temperature                                                                                           | 98 K                          | 98 K                            |
| State                                                                                                 | Powder                        | Powder                          |
| <sup>a</sup> First and second values correspond to Gaussian and Lorentzian line widths, respectively. |                               |                                 |

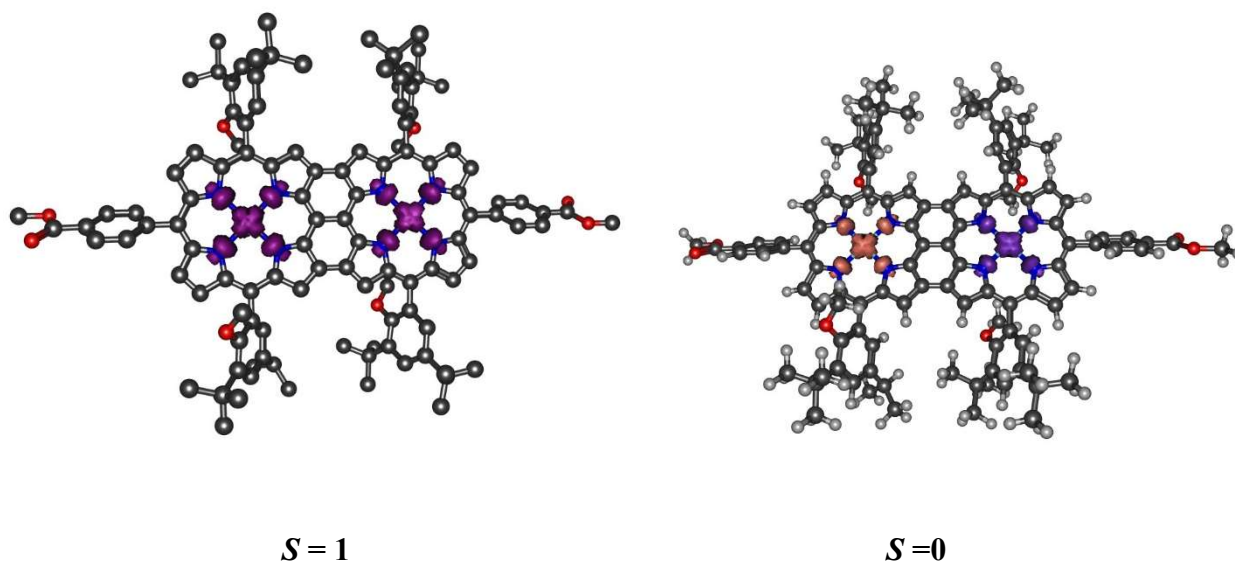

**Figure S16.** Spin density diagram of triplet and singlet state of complex **1**.

| Complex                    | Final Gibbs Free energy |            | $\Delta E_{S=1-S=0}$                         |
|----------------------------|-------------------------|------------|----------------------------------------------|
|                            | $S = 1$                 | $S = 0$    |                                              |
| <b>1</b>                   | -8760.6330              | -8760.6219 | -0.0111 Hartree<br>-2436.16 $\text{cm}^{-1}$ |
| Method: PBE0/def2-TZVP/SVP |                         |            |                                              |

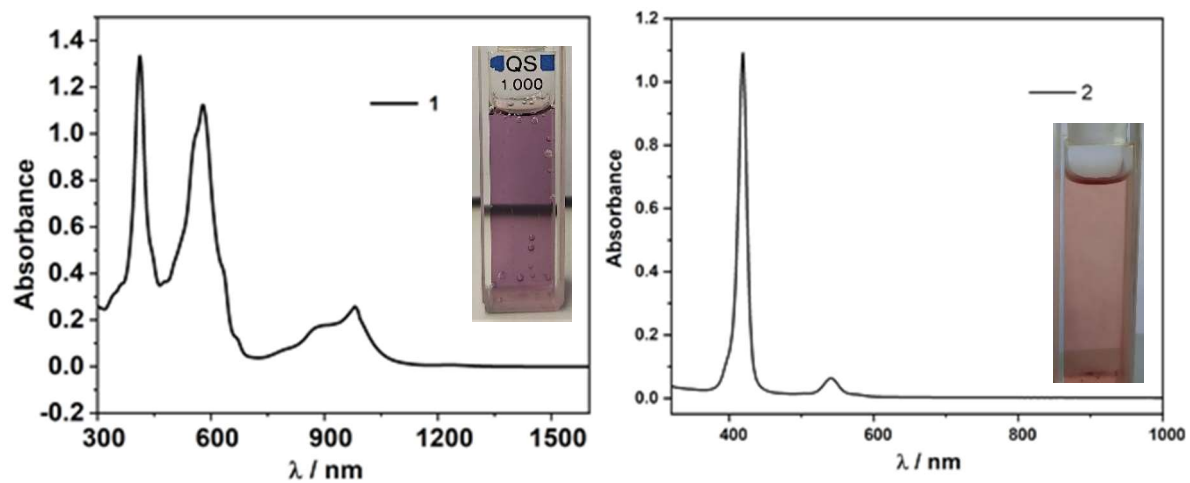

**Figure S17.** UV-Vis-NIR absorption spectrum of **1** and **2** (inset represents colour of the respective solution).

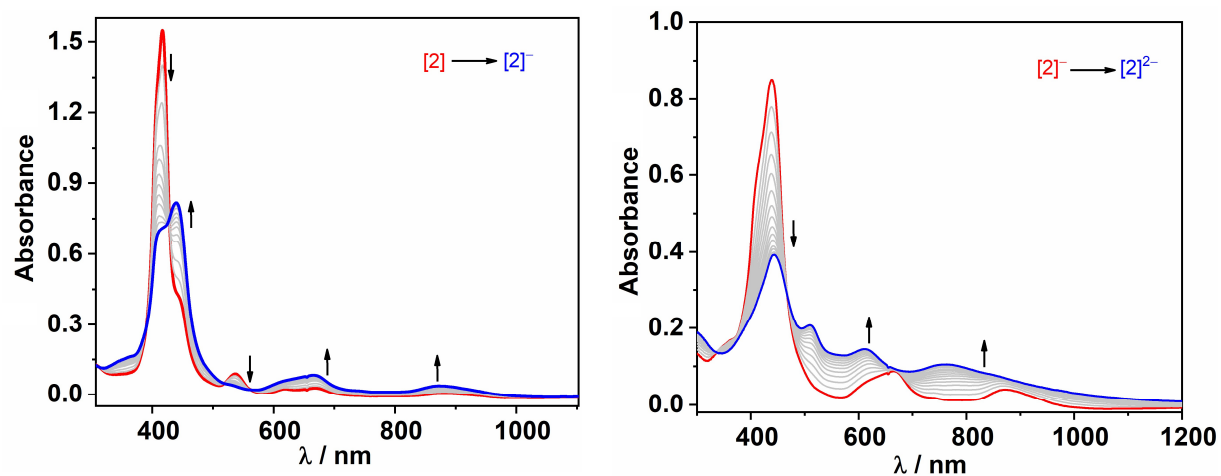

**Figure S18.** UV-Vis-NIR spectroelectrochemical responses of **2** in DMF/0.1 M  $t\text{Bu}_4\text{PF}_6$  solution.

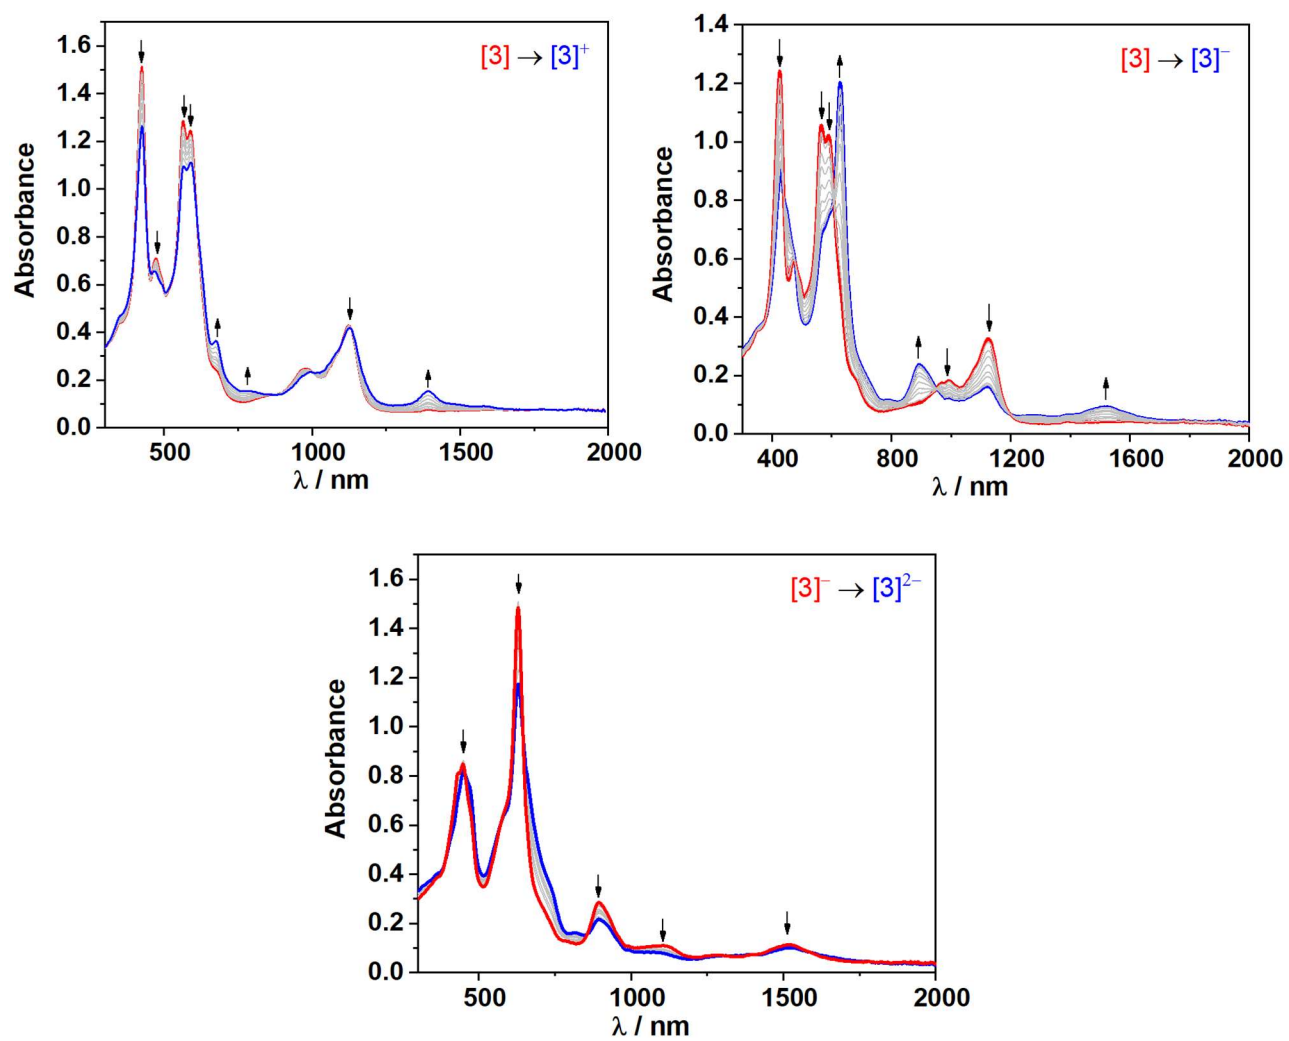

**Figure S19.** UV-Vis-NIR spectroelectrochemical responses of  $3^n$  in DMF/0.1 M  $n\text{Bu}_4\text{PF}_6$  solution.

**Table S3.** Changes in the UV-Vis-NIR absorption bands on Spectroelectrochemical reduction of **1**, **2**, and **3**.

| Complex                | $\lambda_{\text{max}}$ (in nm)       |
|------------------------|--------------------------------------|
| <b>1</b>               | 414, 576, 887, 986                   |
| <b>1</b> <sup>+</sup>  | 412, 588, 686, 728, 1029, 1313, 1569 |
| <b>1</b> <sup>-</sup>  | 415, 611, 865, 1293                  |
| <b>1</b> <sup>2-</sup> | 415, 611, 865, 1293, 1600            |
| <b>2</b>               | 417, 536                             |
| <b>2</b> <sup>-</sup>  | 418, 666, 877                        |
| <b>2</b> <sup>2-</sup> | 442, 511, 612, 764                   |
| <b>3</b>               | 425, 566, 591, 970, 995, 1125        |
| <b>3</b> <sup>+</sup>  | 673, 779(sh), 1392                   |
| <b>3</b> <sup>-</sup>  | 629, 891, 1516                       |
| <b>3</b> <sup>2-</sup> | 474, 727, 1521                       |

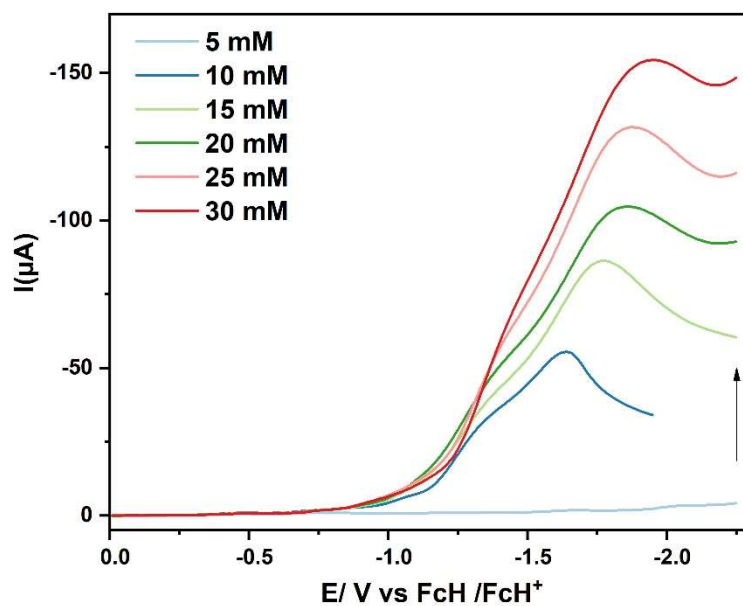

**Figure S20.** Linear sweep voltammograms of complex 1 with increasing concentration of TFA in DMF with 0.1 M  $n\text{Bu}_4\text{PF}_6$  at 100 mV/s (Conditions: GC working electrode, platinum wire as a counter electrode, and  $\text{Fc}/\text{FcH}^+$  couple ( $E_{1/2} = 0.35$  V) as an internal reference).

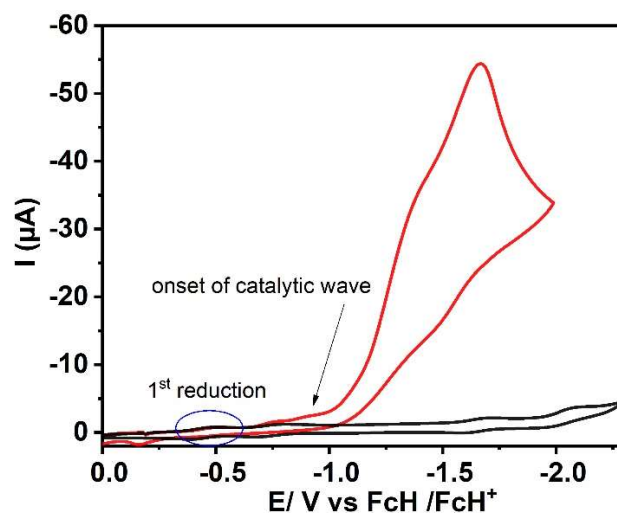

**Figure S21.** Cyclic voltammograms of the catalyst **1** before (black) and after (red) the addition of 5 mM of TFA. The marked area (in blue) indicate appearance of irreversible catalytic wave appears near to the  $\mathbf{1}^{2-}/\mathbf{1}^-$  (second reduction) redox process without affecting the reversibility of the first reduction process. (Conditions: GC working electrode, platinum wire as a counter electrode, and  $\text{Fc}/\text{FcH}^+$  couple ( $E_{1/2} = 0.35$  V) as an internal reference.



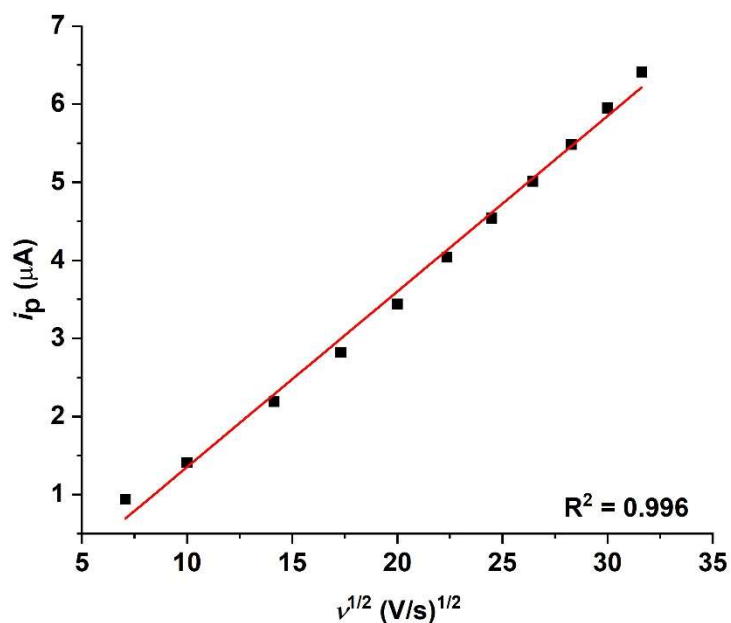

**Figure S22.** Plot of peak current ( $i_p$ ) versus square root of the scan rate of the first reduction wave of complex **1** in the absence of acid. Linear dependence of peak current on the scan rate indicate diffusion controlled electrochemical process. Voltammograms were recorded with 0.01 mM solution of **1** with 0.1 M  $n\text{Bu}_4\text{PF}_6$  at a scan rates of 50 – 1000 mV/s (Conditions: GC working electrode, platinum wire as a counter electrode, and Fc/FcH<sup>+</sup> couple ( $E_{1/2} = 0.41$  V) as an internal reference).

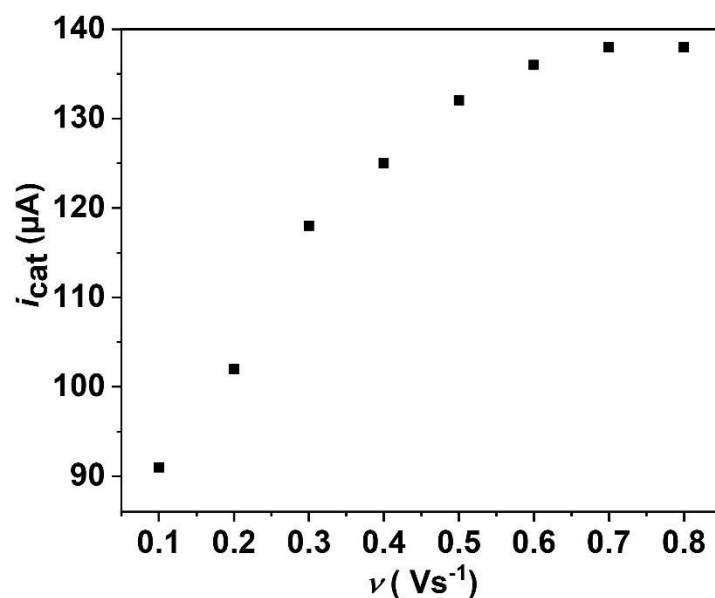

**Figure S23.** Plot of  $i_{\text{cat}}$  versus scan rate of complex **1**.  $i_{\text{cat}}$  increases linearly with scan rate until it reaches a limiting value of 500 mV/s, beyond which it becomes independent of scan rate. Voltammograms were recorded with 0.01 mM solution of **1** with 0.1 M  $n\text{Bu}_4\text{PF}_6$  in the presence of 15 mM TFA (Conditions: GC working electrode, platinum wire as a counter electrode, and Fc/FcH<sup>+</sup> couple as an internal reference).

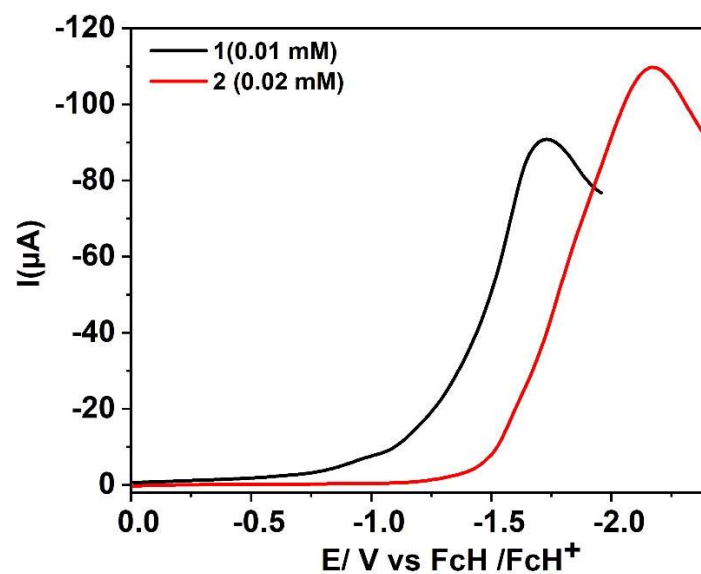

**Figure S24.** Linear sweep voltammograms 0.01 mM and 0.02 mM DMF solutions of **1** (black) and **2** (red) with 0.1 M  $n\text{Bu}_4\text{PF}_6$  in the presence of 15 mM TFA at 100 mV/s (Conditions: GC working electrode, platinum wire as a counter electrode, and  $\text{Fc}/\text{FcH}^+$  couple ( $E_{1/2} = 0.34$  V) as an internal reference).

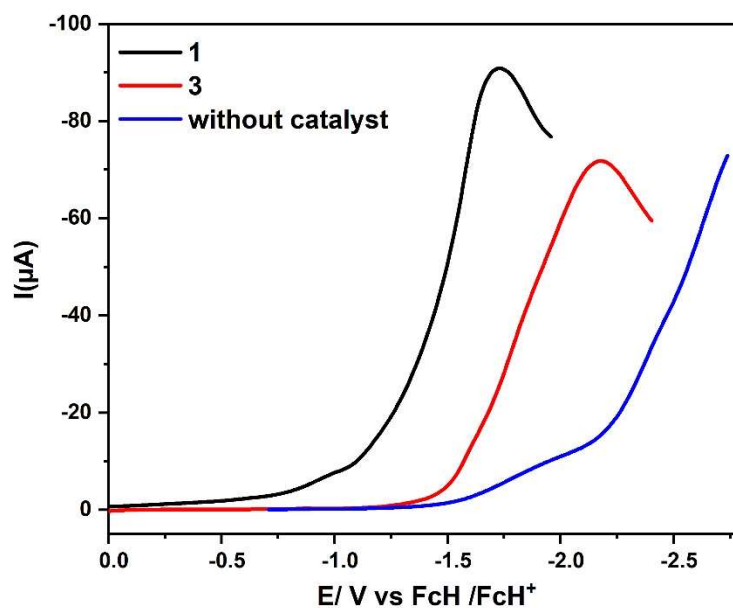

**Figure S25.** Linear sweep voltammograms of 0.01 mM DMF solutions of **1** (black) and **3** (red) with 0.1 M  $n\text{Bu}_4\text{PF}_6$  in the presence of 15 mM TFA at 100 mV/s. Blue line represents voltammograms of a solution containing 0.1 M  $n\text{Bu}_4\text{PF}_6$  in the presence of 15 mM TFA recorded at 100 mV/s in absence of a catalyst (Conditions: GC working electrode, platinum wire as a counter electrode, and  $\text{Fc}/\text{FcH}^+$  couple ( $E_{1/2} = 0.35$  V) as an internal reference).

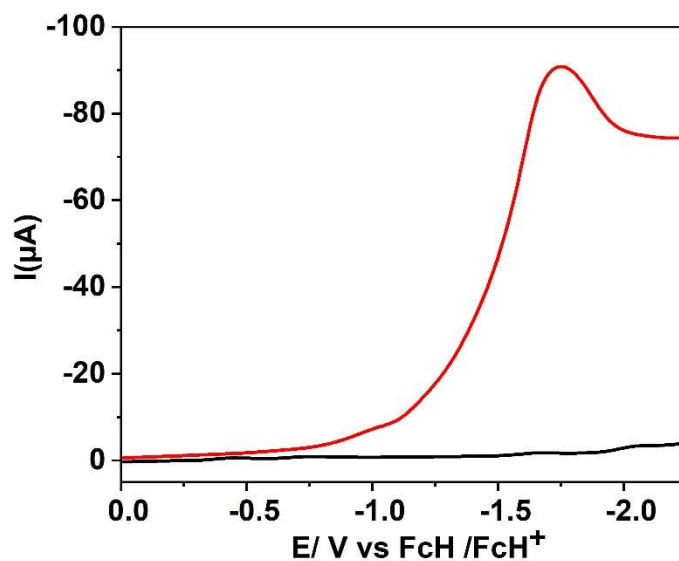

**Figure S26.** Linear sweep voltammogram of 0.01 mM DMF solutions of **1** (red) with 0.1 M <sup>n</sup>Bu<sub>4</sub>PF<sub>6</sub> in the presence of 15 mM TFA at 100 mV/s. Glassy carbon electrode is then taken out from the solution and washed thoroughly with acetone before reusing it for recording linear sweep voltammogram (black line) with a fresh DMF solution containing 0.1 M <sup>n</sup>Bu<sub>4</sub>PF<sub>6</sub> and 15 mM of TFA at 100 mV/s. (Conditions: GC working electrode, platinum wire as a counter electrode, and Fc/FcH<sup>+</sup> couple ( $E_{1/2} = 0.35$  V) as an internal reference).

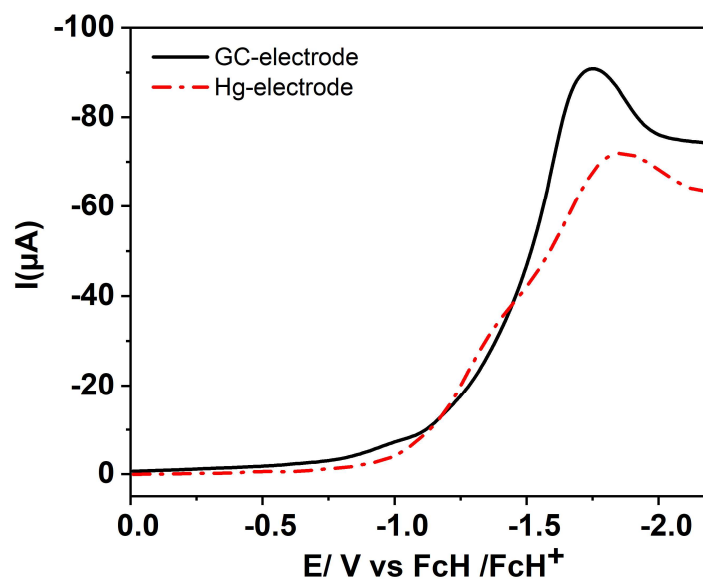

**Figure S27.** Linear sweep voltammogram of 0.01 mM DMF solutions of **1** containing 0.1 M <sup>n</sup>Bu<sub>4</sub>PF<sub>6</sub> in the presence of 15 mM TFA at 100 mV/s with GC electrode (black solid line) and Hg-electrode (red dot).

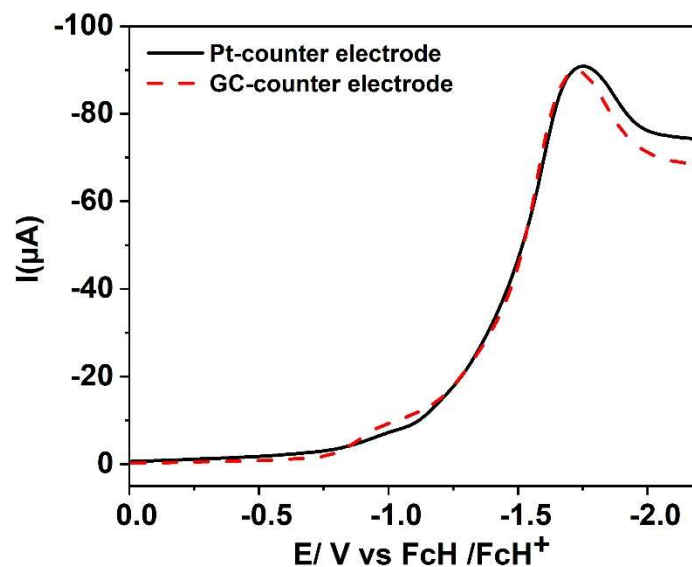

**Figure S28.** Linear sweep voltammogram of 0.01 mM DMF solutions of **1** containing 0.1 M <sup>n</sup>Bu<sub>4</sub>PF<sub>6</sub> in the presence of 15 mM TFA at 100 mV/s with glassy carbon disk (red dot) or platinum wire (black solid line) as a counter electrode. (Conditions: GC working electrode, Ag-wire as a pseudoreference and Fc/FcH<sup>+</sup> couple ( $E_{1/2} = 0.38$  V) as an internal reference).

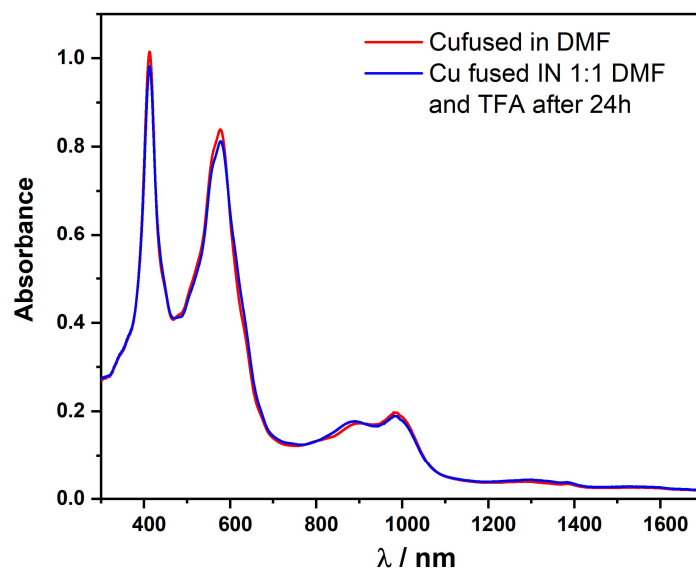

**Figure S29.** UV-Vis-NIR absorption spectrum of **1** in DMF and 1:1 mixture of DMF/TFA solutions in the beginning and after 24 hours.



**Calculation of observed rate–constant ( $k_{obs}$ ).**

The kinetic observed rate constant  $k_{obs}$  (also referred to as TOF) was calculated using the following relation

$$i_{cat} = n_c F A C_{cat}^0 \sqrt{Dk(H^+)^x} \quad (S1)$$

$$i_p = 0.4463 n_p F A C_{cat}^0 \sqrt{\frac{n_p F \nu D}{RT}} \quad (S2)$$

where  $i_{cat}$  and  $i_p$  represents catalytic current and peak currents for non-catalytic reversible processes respectively,  $n_c = 2$  is the number of electrons involved in the catalytic process,  $n_p = 1$  denotes number of electrons involved in the reversible redox process of the catalyst,  $\nu$  is the scan rate (V/s),  $D$  is the diffusion coefficients of the catalyst,  $F$  is the Faraday's constant,  $C_{cat}^0$  is the active catalysts concentration in the bulk solution and  $A$  is the electrochemically active area;  $x$  is the order of the reaction with respect to acid concentration. Dividing equation 1 by equation 2 gives;

$$\frac{i_{cat}}{i_p} = \frac{n_c}{0.4463} \sqrt{\left(\frac{RT}{F\nu}\right) k(H^+)^x} \quad (S3)$$

$$k_{obs} = k(H^+)^x = 1.94 V^{-1} \cdot \nu \left(\frac{i_{cat}}{i_p}\right)^2 \quad (S4)$$

**Table S4.** Calculation of rate constant from the data obtained from the acid titration of 0.01 mM solution of **1** at 300 mV/s.

| Conc. of TFA (M)    | $i_p$ ( $\mu$ A)   | $i_{cat}$ ( $\mu$ A) | $i_{cat}/i_p$      | $k_{obs}(s^{-1})$  |
|---------------------|--------------------|----------------------|--------------------|--------------------|
| $5 \times 10^{-3}$  | $4 \times 10^{-2}$ | $0.52 \times 10^2$   | $1.3 \times 10^3$  | $0.9 \times 10^6$  |
| $10 \times 10^{-3}$ | $4 \times 10^{-2}$ | $1.0765 \times 10^2$ | $2.69 \times 10^3$ | $0.41 \times 10^7$ |
| $15 \times 10^{-3}$ | $4 \times 10^{-2}$ | $1.18 \times 10^2$   | $2.95 \times 10^3$ | $0.5 \times 10^7$  |
| $20 \times 10^{-3}$ | $4 \times 10^{-2}$ | $1.47 \times 10^2$   | $3.67 \times 10^3$ | $0.7 \times 10^7$  |
| $25 \times 10^{-3}$ | $4 \times 10^{-2}$ | $1.64 \times 10^2$   | $4.1 \times 10^3$  | $0.9 \times 10^7$  |
| $30 \times 10^{-3}$ | $4 \times 10^{-2}$ | $1.79 \times 10^2$   | $4.4 \times 10^3$  | $1.1 \times 10^7$  |
| $40 \times 10^{-3}$ | $4 \times 10^{-2}$ | $2.33 \times 10^2$   | $5.8 \times 10^3$  | $1.9 \times 10^7$  |
| $50 \times 10^{-3}$ | $4 \times 10^{-2}$ | $2.46 \times 10^2$   | $6.1 \times 10^3$  | $2.2 \times 10^7$  |

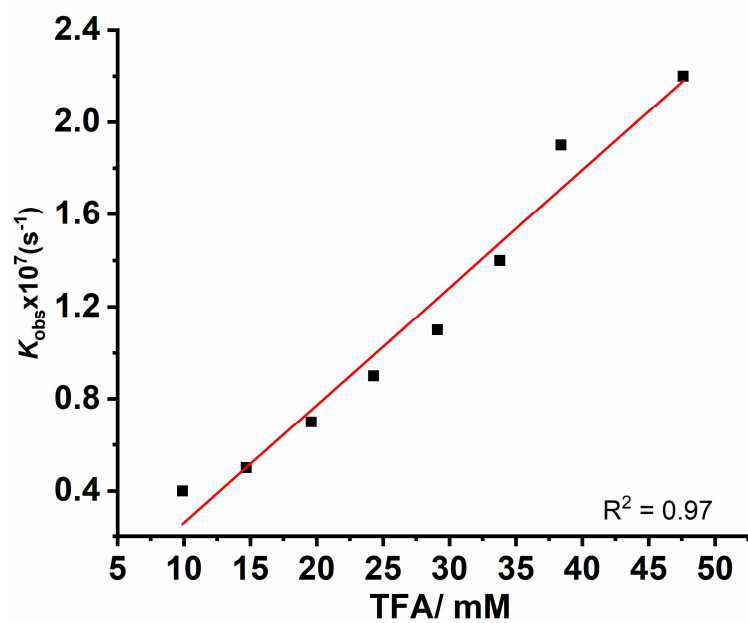

**Figure S30.** Plot of  $k_{\text{obs}}$  versus concentration of acid.

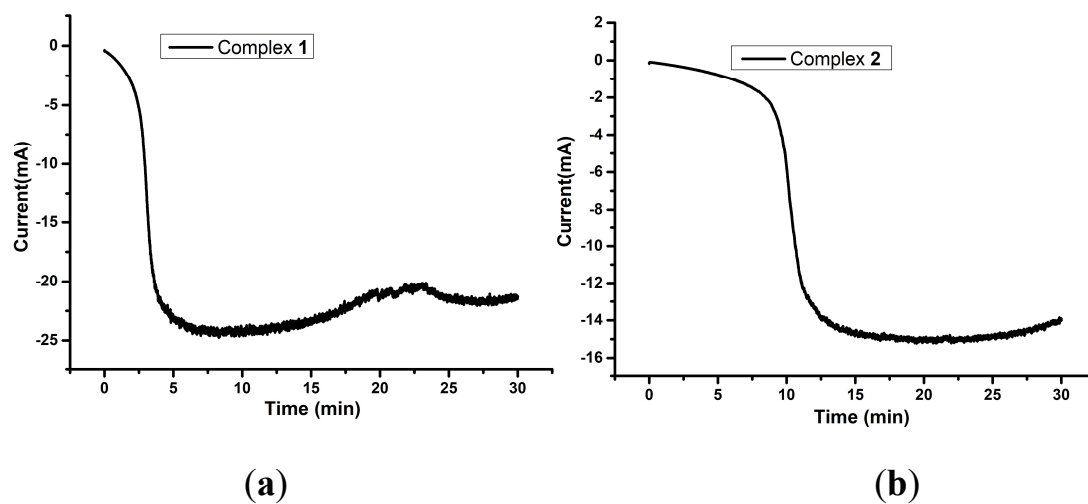

**Figure S31.** Current versus time curve during electrolysis of (a) **1** and (b) **2** at -1.05 V. Conditions: Electrolysis was carried out with 0.06 mM and 0.12 mM DMF solution (30 mL) of **1** and **2** respectively with 0.1 M  $n\text{Bu}_4\text{PF}_6$  in the presence of 0.1 M of TFA.

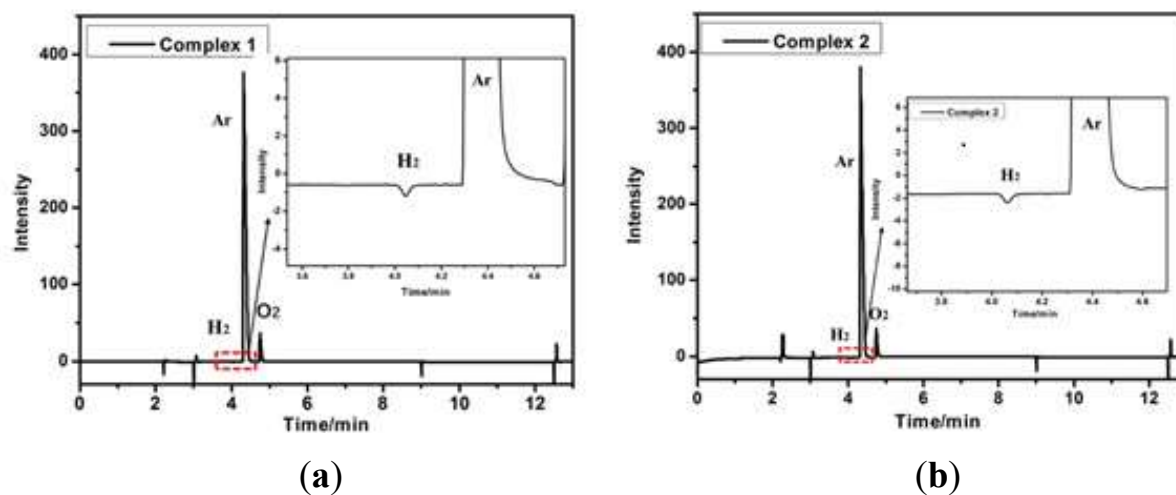

**Figure S32.** Products detection. GC plots of the gas products over Complex 1(a) and Complex 2 (b). The tiny amount of O<sub>2</sub> may come from the syringe during the injection to GC.

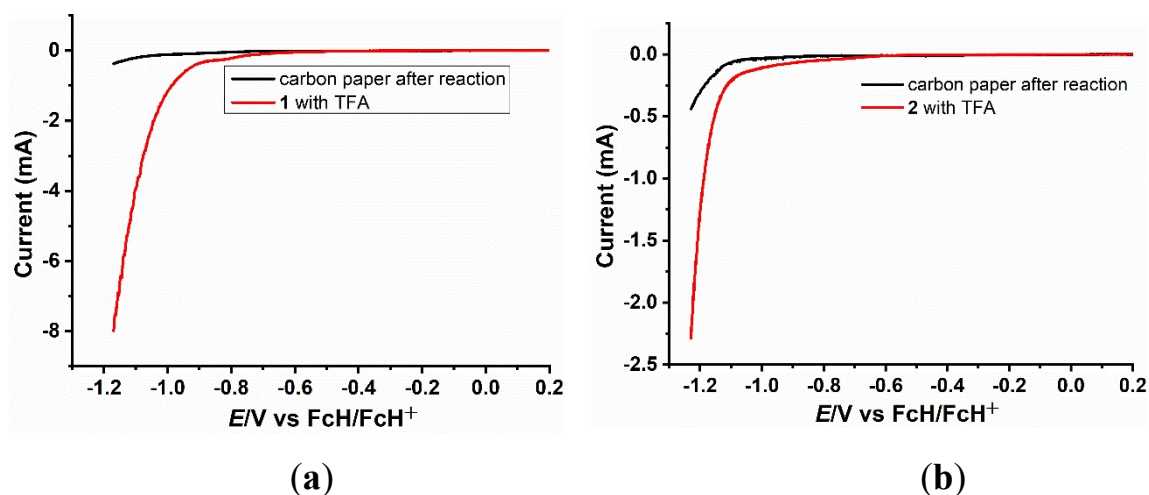

**Figure S33.** Linear sweep voltammograms of 0.06 and 0.12 mM DMF solutions of (a) **1** and (b) **2** with 0.1 M  $n\text{Bu}_4\text{PF}_6$  in the presence of 0.1 M TFA during the controlled potential electrolysis process. Carbon paper is then taken out from the solution and washed thoroughly with DMF three times before reusing it for recording linear sweep voltammogram (black line) with a fresh DMF solution containing 0.1 M  $n\text{Bu}_4\text{PF}_6$  and 0.1 M of TFA solution.

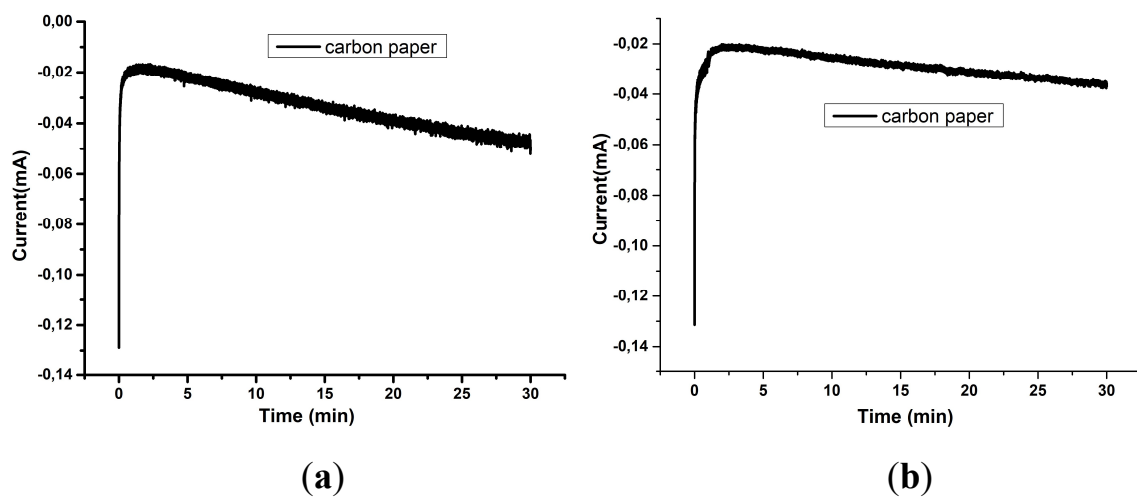

**Figure S34.** Current versus time plot with the rinsed carbon paper working electrode at a constant potential of -1.05 V. Plot (a) and (b) indicate electrolysis process carried out with the electrode taken out of the solution of complexes **1** and **2** respectively.

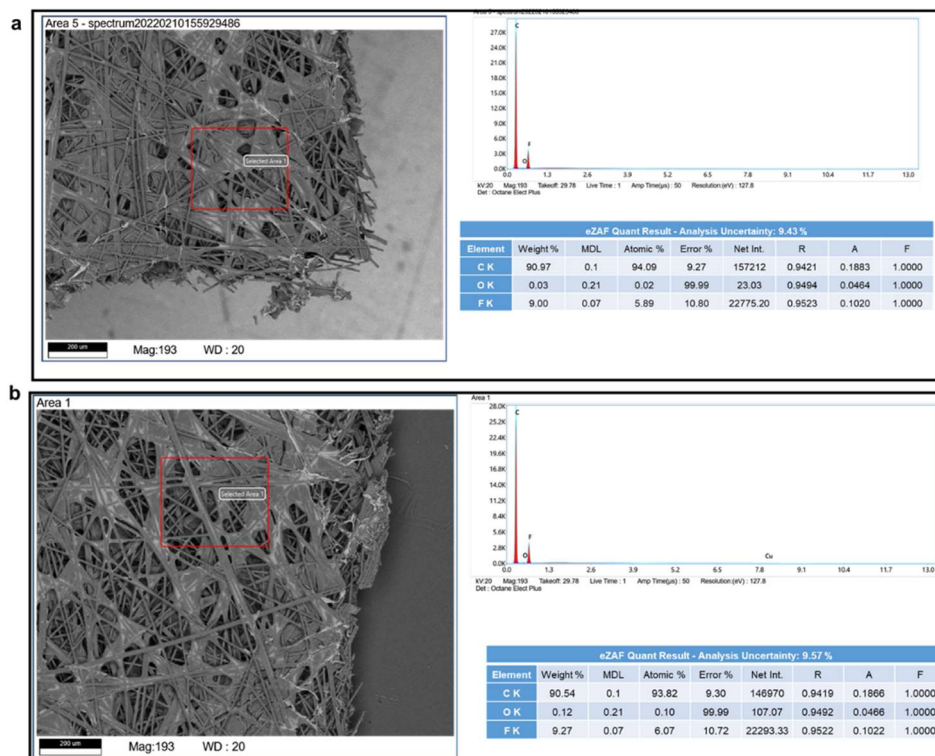

**Figure S35.** (a) and (b) indicate SEM/EDX results carried out with the electrodes taken out of the solution of complexes **1** and **2** after bulk electrolysis. Reaction condition: constant potential of  $-1.05\text{ V vs. Fc/FcH}^+$  for 30min.

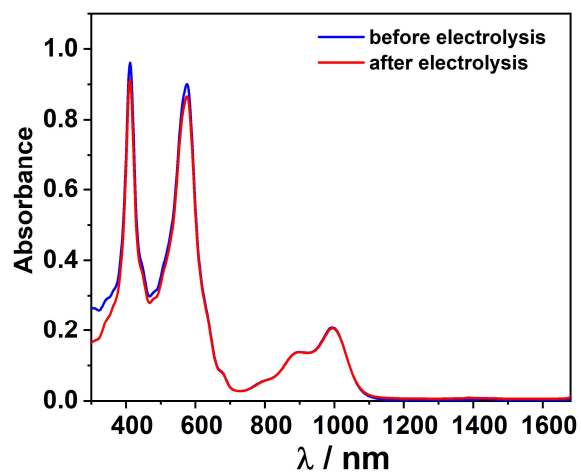

**Figure S36.** UV-Vis-NIR absorption spectrum of **1** in DMF before (blue) and after (red) bulk-electrolysis.



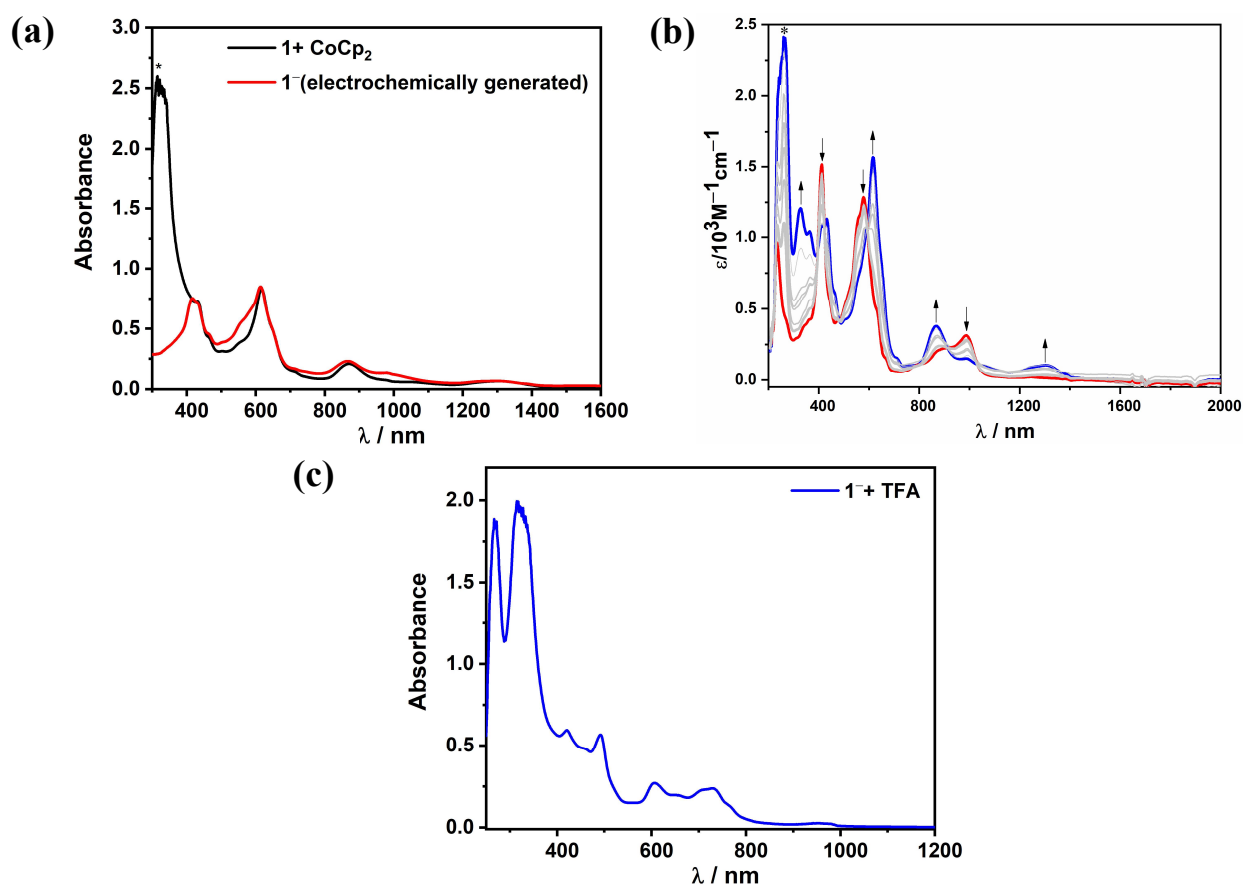

**Figure S37.** (a) UV-Vis-NIR absorption spectra of the electrochemically (red) and chemically (black) generated one-electron reduced species of complex **1**. \*indicates absorption peaks corresponding to the cobaltocene. (b) Chemical reduction of **1** with increasing concentration of Cobaltocene (\* indicates absorption peaks corresponding to the cobaltocene.), (c) Absorption spectra of the reaction of one electron reduced species (1<sup>-</sup>) with TFA.

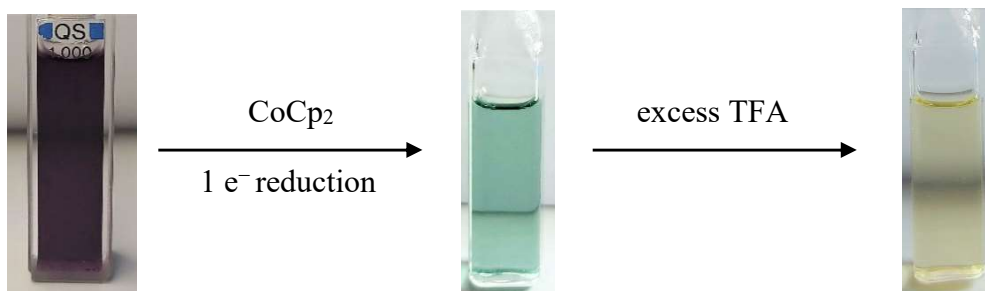

**Figure S38.** Change in colour of the DMF solution of **1** upon one electron reduction (light green) and reaction of the reduced species with TFA (yellow).

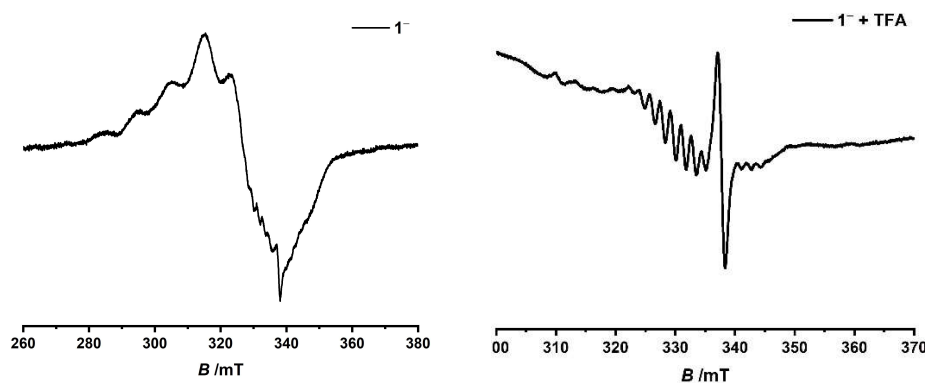

**Figure S39.** EPR spectra of the one electron reduced species ( $1^-$ ) of the catalyst **1** (left) and solution of one electron reduced species with TFA ( $1^- + \text{TFA}$ ) measured at  $-175^\circ\text{C}$ .

- [1] I. S. Weitz, M. Rabinovitz, *J. Chem. Soc., Perkin Trans. 1* **1993**, 117.
- [2] G. R. Fulmer, A. J. M. Miller, N. H. Sherden, H. E. Gottlieb, A. Nudelman, B. M. Stoltz, J. E. Bercaw, K. I. Goldberg, *Organometallics* **2010**, *29*, 2176.
- [3] M. Krejčík, M. Daněk, F. Hartl, *J. Electroanal. Chem. Interf. Electrochem.* **1991**, *317*, 179.
- [4] S. Stoll, A. Schweiger, *J. Magn. Reson.* **2006**, *178*, 42.
- [5] F. Neese, *WIREs Comput Mol Sci.* **2018**, *8*.
- [6] C. Adamo, V. Barone, *J. Chem. Phys.* **1999**, *110*, 6158.
- [7] F. Weigend, R. Ahlrichs, *Phys. Chem. Chem. Phys.* **2005**, *7*, 3297.
- [8] V. Barone, M. Cossi, *J. Phys. Chem. A* **1998**, *102*, 1995.
- [9] a) S. Grimme, *J. Comput. Chem.* **2006**, *27*, 1787; b) S. Grimme, *J. Comput. Chem.* **2004**, *25*, 1463; c) S. Grimme, J. Antony, S. Ehrlich, H. Krieg, *J. Chem. Phys.* **2010**, *132*, 154104; d) S. Grimme, S. Ehrlich, L. Goerigk, *J. Comput. Chem.* **2011**, *32*, 1456.
- [10] a) P. Seth, P. L. Ríos, R. J. Needs, *J. Chem. Phys.* **2011**, *134*, 84105; b) F. Neese, G. Olbrich, *Chem. Phys. Lett.* **2002**, *362*, 170; c) R. Izsák, F. Neese, *J. Chem. Phys.* **2011**, *135*, 144105; d) J. L. Whitten, *J. Chem. Phys.* **1973**, *58*, 4496; e) O. Vahtras, J. Almlöf, M. W. Feyereisen, *Chem. Phys. Lett.* **1993**, *213*, 514; f) F. Neese, F. Wennmohs, A. Hansen, *J. Chem. Phys.* **2009**, *130*, 114108; g) F. Neese, *J. Comput. Chem.* **2003**, *24*, 1740.
- [11] a) K. Eichkorn, O. Treutler, H. Öhm, M. Häser, R. Ahlrichs, *Chem. Phys. Lett.* **1995**, *240*, 283; b) K. Eichkorn, F. Weigend, O. Treutler, R. Ahlrichs, *Theor. Chem. Acc.* **1997**, *97*, 119; c) F. Weigend, *Phys. Chem. Chem. Phys.* **2006**, *8*, 1057.
- [12] P.-O. Löwdin, *J. Chem. Phys.* **1950**, *18*, 365.
- [13] a) D. Doehnert, J. Koutecky, *J. Am. Chem. Soc.* **1980**, *102*, 1789; b) J. Gräfenstein, E. Kraka, M. Filatov, D. Cremer, *Int. J. Mol. Sci.* **2002**, *3*, 360; c) F. Neese, *J. Phys. Chem. Solids* **2004**, *65*, 781; d) K. Yamaguchi, *Chem. Phys. Lett.* **1975**, *33*, 330.
- [14] *Chemcraft - graphical software for visualization of quantum chemistry computations*, Chemcraft.
- [15] F. C. Gaenzler, C. Guo, Y.-W. Zhang, M. E. Azab, M. A.I. Salem, D. P. Fan, M. B. Smith, *Tetrahedron* **2009**, *65*, 8781.
- [16] S. M. Elbert, P. Wagner, T. Kanagasundaram, F. Rominger, M. Mastalerz, *Chem. Eur. J.* **2017**, *23*, 935.
- [17] B. J. Littler, M. A. Miller, C.-H. Hung, R. W. Wagner, D. F. O'Shea, P. D. Boyle, J. S. Lindsey, *J. Org. Chem.* **1999**, *64*, 1391.
- [18] T. Rohand, E. Dolusic, T. H. Ngo, W. Maes, W. Dehaen, *Arkivoc* **2007**, *2007*, 307.

## SUPPORTING INFORMATION

---

### Cartesian coordinates of the computed structures:

#### 1 (triplet)

|   |              |              |              |
|---|--------------|--------------|--------------|
| N | 14.122104000 | 10.366010000 | 5.473574000  |
| N | 14.250013000 | 12.330338000 | 3.402117000  |
| N | 15.001261000 | 4.598624000  | 7.742567000  |
| N | 15.169869000 | 8.397907000  | 3.675505000  |
| N | 14.970496000 | 2.646901000  | 9.827460000  |
| N | 13.958396000 | 6.564497000  | 9.540452000  |
| N | 15.326339000 | 10.359007000 | 1.605237000  |
| N | 13.875828000 | 4.609911000  | 11.624187000 |
| O | 14.704685000 | 15.208960000 | 6.548824000  |
| C | 15.011648000 | 7.601378000  | 4.781668000  |
| C | 13.763817000 | 9.711635000  | 7.675692000  |
| C | 14.187900000 | 9.310800000  | 6.347980000  |
| C | 14.099576000 | 7.361083000  | 8.432206000  |
| C | 14.578502000 | 7.984867000  | 6.068343000  |
| C | 14.346308000 | 13.125517000 | 2.274814000  |
| C | 14.528100000 | 6.977066000  | 7.144403000  |
| C | 13.728891000 | 8.730783000  | 8.729090000  |
| C | 14.918521000 | 5.651395000  | 6.866039000  |
| C | 15.369720000 | 6.228634000  | 4.483855000  |
| O | 14.862131000 | -1.533306000 | 17.549303000 |
| C | 15.630340000 | 7.560847000  | 2.667931000  |
| O | 16.029627000 | 17.820252000 | -2.841232000 |
| C | 15.019660000 | 13.782772000 | -0.028957000 |
| O | 14.488172000 | 7.800218000  | 14.335923000 |
| C | 13.433986000 | 11.053836000 | 7.587459000  |
| H | 13.076963000 | 11.714173000 | 8.384352000  |
| C | 12.766973000 | 13.732276000 | 6.620671000  |
| C | 15.332374000 | 5.249026000  | 5.536364000  |
| C | 15.404965000 | 11.453331000 | 0.762467000  |
| C | 16.518892000 | 6.941664000  | 0.421724000  |

## SUPPORTING INFORMATION

---

|   |              |              |              |
|---|--------------|--------------|--------------|
| C | 15.982286000 | 7.965370000  | 1.366286000  |
| C | 13.644216000 | 11.440016000 | 6.211083000  |
| C | 13.433031000 | 14.934896000 | 6.981156000  |
| C | 14.922607000 | 12.749657000 | 1.042226000  |
| C | 15.483702000 | 3.527796000  | 7.002720000  |
| C | 13.369232000 | 8.753167000  | 10.066445000 |
| H | 13.043059000 | 9.612016000  | 10.661657000 |
| O | 14.636564000 | 7.182136000  | -1.105005000 |
| C | 10.789335000 | 14.415245000 | 7.912225000  |
| C | 14.335426000 | 1.222896000  | 13.297685000 |
| C | 15.736059000 | 6.203084000  | 3.149170000  |
| H | 16.058512000 | 5.341921000  | 2.555361000  |
| C | 16.475099000 | 1.301565000  | 6.582077000  |
| C | 15.599295000 | 1.883678000  | 8.860045000  |
| C | 12.609421000 | 8.004077000  | 12.798680000 |
| C | 11.465997000 | 13.489969000 | 7.100615000  |
| H | 10.976564000 | 12.551791000 | 6.799085000  |
| C | 13.380340000 | 12.726599000 | 5.704038000  |
| C | 13.842742000 | 3.521888000  | 12.478364000 |
| C | 15.829049000 | 2.264403000  | 7.521236000  |
| C | 13.633244000 | 13.105272000 | 4.367914000  |
| C | 14.368100000 | 2.240240000  | 12.208056000 |
| C | 15.885092000 | 9.299824000  | 0.913438000  |
| C | 13.495007000 | 7.397089000  | 10.549689000 |
| C | 15.203061000 | 15.749729000 | -2.057723000 |
| C | 16.350059000 | 9.741685000  | -0.382016000 |
| H | 16.852532000 | 9.108441000  | -1.120537000 |
| C | 14.934538000 | 1.868026000  | 10.969297000 |
| C | 13.749181000 | 14.420623000 | 2.529237000  |
| H | 13.661348000 | 15.233623000 | 1.801186000  |
| C | 15.671653000 | 3.911042000  | 5.623918000  |
| H | 16.028083000 | 3.254082000  | 4.824488000  |

## SUPPORTING INFORMATION

---

|   |              |              |              |
|---|--------------|--------------|--------------|
| O | 13.555995000 | -2.803166000 | 16.198829000 |
| O | 18.440819000 | 2.717088000  | 6.298093000  |
| C | 11.460118000 | 15.615907000 | 8.211579000  |
| H | 10.946700000 | 16.358483000 | 8.831484000  |
| C | 16.059413000 | 11.079776000 | -0.474685000 |
| H | 16.281653000 | 11.757112000 | -1.305641000 |
| C | 12.767169000 | 15.912740000 | 7.772020000  |
| C | 13.306569000 | 14.405925000 | 3.828432000  |
| H | 12.790935000 | 15.203024000 | 4.373949000  |
| C | 17.710720000 | 1.611766000  | 5.948845000  |
| C | 13.161551000 | 6.988214000  | 11.855627000 |
| C | 13.293543000 | 5.658420000  | 12.313422000 |
| C | 13.271455000 | 8.338874000  | 14.007616000 |
| C | 16.000466000 | 0.609643000  | 9.414586000  |
| H | 16.540877000 | -0.173069000 | 8.871686000  |
| C | 14.274652000 | -0.712413000 | 15.364221000 |
| C | 11.369804000 | 8.607334000  | 12.491949000 |
| H | 10.886370000 | 8.321908000  | 11.548327000 |
| C | 13.188780000 | 3.886100000  | 13.718627000 |
| H | 12.996001000 | 3.209726000  | 14.557698000 |
| C | 15.262818000 | 16.754461000 | -3.162014000 |
| C | 9.375777000  | 14.091216000 | 8.427705000  |
| C | 15.584259000 | 0.597252000  | 10.723448000 |
| H | 15.724319000 | -0.198443000 | 11.462413000 |
| C | 12.852816000 | 5.212738000  | 13.616144000 |
| H | 12.336374000 | 5.835835000  | 14.353609000 |
| C | 15.789820000 | 0.126302000  | 6.222630000  |
| H | 14.835480000 | -0.085633000 | 6.727903000  |
| O | 14.688301000 | 16.637096000 | -4.235225000 |
| C | 15.845815000 | 6.619669000  | -0.787380000 |
| C | 10.756597000 | 9.514296000  | 13.365588000 |
| C | 11.415146000 | 9.778568000  | 14.585998000 |

## SUPPORTING INFORMATION

---

|   |              |              |              |
|---|--------------|--------------|--------------|
| H | 10.937508000 | 10.472725000 | 15.289076000 |
| C | 12.656193000 | 9.222503000  | 14.943327000 |
| C | 14.277466000 | -1.697381000 | 16.487762000 |
| C | 18.189979000 | 0.807310000  | 4.878823000  |
| C | 14.346596000 | 13.611915000 | -1.260658000 |
| H | 13.735530000 | 12.712080000 | -1.424606000 |
| C | 17.750561000 | 6.319110000  | 0.713877000  |
| H | 18.263660000 | 6.578052000  | 1.653604000  |
| C | 9.426088000  | 10.216508000 | 13.042145000 |
| C | 18.343223000 | 5.411827000  | -0.174911000 |
| C | 14.435263000 | 14.584968000 | -2.260424000 |
| H | 13.905268000 | 14.458456000 | -3.215715000 |
| C | 14.990325000 | 0.490266000  | 15.533714000 |
| H | 15.528265000 | 0.659067000  | 16.477961000 |
| C | 15.880515000 | 15.925686000 | -0.833257000 |
| H | 16.486537000 | 16.827337000 | -0.669567000 |
| C | 15.018428000 | 1.447447000  | 14.515387000 |
| H | 15.589175000 | 2.377579000  | 14.653448000 |
| C | 13.446688000 | 17.246084000 | 8.152573000  |
| C | 17.677069000 | 5.154581000  | -1.389331000 |
| H | 18.145104000 | 4.459028000  | -2.097519000 |
| C | 15.785858000 | 14.954026000 | 0.169099000  |
| H | 16.325016000 | 15.094619000 | 1.117589000  |
| C | 16.437481000 | 5.728902000  | -1.730532000 |
| C | 15.731475000 | 14.232261000 | 6.730803000  |
| H | 15.812663000 | 13.539343000 | 5.867424000  |
| H | 15.572397000 | 13.641524000 | 7.657008000  |
| H | 16.686537000 | 14.787015000 | 6.820576000  |
| C | 17.448478000 | -0.347062000 | 4.552624000  |
| H | 17.819564000 | -0.981628000 | 3.740701000  |
| C | 13.622493000 | 0.013407000  | 13.132681000 |
| H | 13.076303000 | -0.169949000 | 12.195599000 |

## SUPPORTING INFORMATION

---

|   |              |              |              |
|---|--------------|--------------|--------------|
| C | 16.268163000 | -0.731568000 | 5.217482000  |
| C | 13.588450000 | -0.942726000 | 14.153716000 |
| H | 13.022878000 | -1.874471000 | 14.015886000 |
| C | 13.325362000 | 9.569386000  | 16.290717000 |
| C | 13.816933000 | 18.028260000 | 6.870894000  |
| H | 14.511220000 | 17.454034000 | 6.230258000  |
| H | 14.302721000 | 18.990678000 | 7.136411000  |
| H | 12.909280000 | 18.262563000 | 6.276493000  |
| C | 13.570627000 | 7.133389000  | -0.154669000 |
| H | 12.626211000 | 7.134718000  | -0.734554000 |
| H | 13.564515000 | 8.015779000  | 0.518889000  |
| H | 13.613293000 | 6.208928000  | 0.458298000  |
| C | 16.140767000 | 18.836459000 | -3.848270000 |
| H | 16.587626000 | 18.427552000 | -4.776901000 |
| H | 16.796687000 | 19.618198000 | -3.425456000 |
| H | 15.147330000 | 19.265217000 | -4.090476000 |
| C | 19.694847000 | 4.786556000  | 0.146452000  |
| H | 19.829716000 | 4.872443000  | 1.246903000  |
| C | 19.461423000 | 1.188875000  | 4.090730000  |
| C | 13.505886000 | -3.803415000 | 17.226549000 |
| H | 12.882873000 | -4.623593000 | 16.827518000 |
| H | 13.051399000 | -3.397817000 | 18.152939000 |
| H | 14.521493000 | -4.179627000 | 17.463945000 |
| C | 15.557065000 | 7.856621000  | 13.389294000 |
| H | 15.577169000 | 6.970732000  | 12.720692000 |
| H | 16.498647000 | 7.871492000  | 13.973413000 |
| H | 15.504527000 | 8.777132000  | 12.771123000 |
| C | 14.713154000 | 16.972178000 | 8.996984000  |
| H | 14.459013000 | 16.412949000 | 9.921129000  |
| H | 15.182129000 | 17.931033000 | 9.302362000  |
| H | 15.467589000 | 16.389143000 | 8.438128000  |
| C | 12.518478000 | 18.143985000 | 8.992078000  |



## SUPPORTING INFORMATION

---

|   |              |              |              |
|---|--------------|--------------|--------------|
| H | 11.587149000 | 18.410137000 | 8.451930000  |
| H | 13.043303000 | 19.091784000 | 9.228458000  |
| H | 12.236626000 | 17.676073000 | 9.957324000  |
| C | 15.747875000 | 5.393532000  | -3.070616000 |
| C | 20.693159000 | 1.161709000  | 5.024910000  |
| H | 20.593802000 | 1.879845000  | 5.859477000  |
| H | 21.609937000 | 1.423298000  | 4.455902000  |
| H | 20.841053000 | 0.149547000  | 5.455035000  |
| C | 18.693274000 | 2.986074000  | 7.677793000  |
| H | 19.660675000 | 3.524671000  | 7.724613000  |
| H | 18.776105000 | 2.048996000  | 8.266948000  |
| H | 17.913194000 | 3.633257000  | 8.130571000  |
| C | 12.453886000 | 10.517820000 | 17.135204000 |
| H | 12.284797000 | 11.493856000 | 16.636401000 |
| H | 12.965891000 | 10.725661000 | 18.096590000 |
| H | 11.465121000 | 10.077884000 | 17.377635000 |
| C | 19.288575000 | 2.598629000  | 3.475125000  |
| H | 18.415787000 | 2.626206000  | 2.790412000  |
| H | 20.189321000 | 2.867529000  | 2.885687000  |
| H | 19.139713000 | 3.370063000  | 4.252412000  |
| C | 20.830872000 | 5.582045000  | -0.521113000 |
| H | 20.741378000 | 5.548134000  | -1.627800000 |
| H | 21.822985000 | 5.165032000  | -0.248752000 |
| H | 20.813341000 | 6.647975000  | -0.215076000 |
| C | 8.370716000  | 9.831467000  | 14.102286000 |
| H | 8.184969000  | 8.737565000  | 14.103224000 |
| H | 7.406362000  | 10.340715000 | 13.894757000 |
| H | 8.687260000  | 10.121538000 | 15.124661000 |
| C | 8.813967000  | 15.209263000 | 9.321451000  |
| H | 8.718869000  | 16.171243000 | 8.777586000  |
| H | 9.443983000  | 15.381739000 | 10.217957000 |
| H | 7.801422000  | 14.931041000 | 9.678243000  |

## SUPPORTING INFORMATION

---

|   |              |              |              |
|---|--------------|--------------|--------------|
| C | 9.648196000  | 11.745705000 | 13.071432000 |
| H | 9.962723000  | 12.098632000 | 14.074387000 |
| H | 8.712832000  | 12.281753000 | 12.807580000 |
| H | 10.431365000 | 12.050380000 | 12.347364000 |
| C | 19.732649000 | 0.211477000  | 2.931852000  |
| H | 19.918107000 | -0.823700000 | 3.283966000  |
| H | 20.638975000 | 0.538655000  | 2.382856000  |
| H | 18.898615000 | 0.184373000  | 2.201108000  |
| C | 8.892783000  | 9.824065000  | 11.654208000 |
| H | 9.602381000  | 10.089978000 | 10.844604000 |
| H | 7.942093000  | 10.357271000 | 11.450912000 |
| H | 8.683375000  | 8.737368000  | 11.581896000 |
| C | 8.426074000  | 13.898240000 | 7.224642000  |
| H | 8.365138000  | 14.820824000 | 6.611164000  |
| H | 7.401160000  | 13.652440000 | 7.573290000  |
| H | 8.759937000  | 13.073614000 | 6.562937000  |
| C | 19.775660000 | 3.298418000  | -0.220472000 |
| H | 18.948372000 | 2.715202000  | 0.231959000  |
| H | 20.731436000 | 2.860989000  | 0.134164000  |
| H | 19.738383000 | 3.142295000  | -1.319049000 |
| C | 9.429507000  | 12.786327000 | 9.254224000  |
| H | 9.791248000  | 11.928436000 | 8.651999000  |
| H | 8.421039000  | 12.524718000 | 9.636259000  |
| H | 10.105346000 | 12.895480000 | 10.126575000 |
| C | 13.541254000 | 8.278057000  | 17.113835000 |
| H | 12.572377000 | 7.780714000  | 17.327963000 |
| H | 14.017502000 | 8.519809000  | 18.087180000 |
| H | 14.188749000 | 7.558329000  | 16.580032000 |
| C | 14.387589000 | 4.705768000  | -2.809604000 |
| H | 14.521570000 | 3.773031000  | -2.223592000 |
| H | 13.908598000 | 4.431830000  | -3.772973000 |
| H | 13.688889000 | 5.361258000  | -2.258822000 |

## SUPPORTING INFORMATION

---

|                    |              |              |              |
|--------------------|--------------|--------------|--------------|
| C                  | 16.594923000 | 4.431154000  | -3.924288000 |
| H                  | 17.587495000 | 4.855516000  | -4.178329000 |
| H                  | 16.068657000 | 4.230398000  | -4.879483000 |
| H                  | 16.754720000 | 3.453239000  | -3.426115000 |
| C                  | 15.544152000 | 6.688336000  | -3.891413000 |
| H                  | 14.914378000 | 7.418465000  | -3.350597000 |
| H                  | 15.053515000 | 6.454472000  | -4.859544000 |
| H                  | 16.518599000 | 7.169860000  | -4.116212000 |
| C                  | 14.677051000 | 10.278770000 | 16.043106000 |
| H                  | 15.390968000 | 9.634590000  | 15.498355000 |
| H                  | 15.142494000 | 10.559618000 | 17.011116000 |
| H                  | 14.533618000 | 11.209698000 | 15.456436000 |
| C                  | 15.490816000 | -2.013945000 | 4.869902000  |
| C                  | 15.400946000 | -2.903012000 | 6.130552000  |
| H                  | 16.410579000 | -3.193120000 | 6.488096000  |
| H                  | 14.836076000 | -3.833432000 | 5.912274000  |
| H                  | 14.883475000 | -2.386236000 | 6.964146000  |
| C                  | 16.171992000 | -2.819607000 | 3.751191000  |
| H                  | 16.237592000 | -2.245894000 | 2.804199000  |
| H                  | 15.586790000 | -3.737619000 | 3.539885000  |
| H                  | 17.196685000 | -3.138299000 | 4.031773000  |
| C                  | 14.065903000 | -1.637965000 | 4.405574000  |
| H                  | 13.505237000 | -1.091052000 | 5.190324000  |
| H                  | 13.484718000 | -2.550123000 | 4.155460000  |
| H                  | 14.096524000 | -0.995159000 | 3.501631000  |
| Cu                 | 14.715443000 | 10.365067000 | 3.535930000  |
| Cu                 | 14.451096000 | 4.602979000  | 9.686120000  |
| <b>1 (singlet)</b> |              |              |              |
| N                  | 14.122517000 | 10.366011000 | 5.473491000  |
| N                  | 14.251452000 | 12.330507000 | 3.402100000  |
| N                  | 15.002439000 | 4.599161000  | 7.743112000  |
| N                  | 15.170748000 | 8.397801000  | 3.675722000  |

## SUPPORTING INFORMATION

---

|   |              |              |              |
|---|--------------|--------------|--------------|
| N | 14.971270000 | 2.647390000  | 9.828080000  |
| N | 13.958395000 | 6.564897000  | 9.540493000  |
| N | 15.326478000 | 10.358592000 | 1.604958000  |
| N | 13.877259000 | 4.610797000  | 11.624895000 |
| O | 14.705103000 | 15.210517000 | 6.545676000  |
| C | 15.012151000 | 7.601371000  | 4.781809000  |
| C | 13.764621000 | 9.712019000  | 7.675822000  |
| C | 14.188519000 | 9.310991000  | 6.347989000  |
| C | 14.099828000 | 7.361395000  | 8.432318000  |
| C | 14.578973000 | 7.984966000  | 6.068467000  |
| C | 14.347232000 | 13.125394000 | 2.274542000  |
| C | 14.528572000 | 6.977334000  | 7.144574000  |
| C | 13.729334000 | 8.731275000  | 8.729157000  |
| C | 14.918904000 | 5.651582000  | 6.866348000  |
| C | 15.369659000 | 6.228367000  | 4.483970000  |
| O | 14.862837000 | -1.531775000 | 17.550668000 |
| C | 15.630668000 | 7.560588000  | 2.668058000  |
| O | 16.031296000 | 17.819761000 | -2.841457000 |
| C | 15.020577000 | 13.782407000 | -0.029281000 |
| O | 14.485716000 | 7.798758000  | 14.336960000 |
| C | 13.435252000 | 11.054303000 | 7.587485000  |
| H | 13.078696000 | 11.714936000 | 8.384342000  |
| C | 12.768349000 | 13.732701000 | 6.620436000  |
| C | 15.332345000 | 5.248946000  | 5.536508000  |
| C | 15.405463000 | 11.452913000 | 0.762199000  |
| C | 16.517622000 | 6.941077000  | 0.421151000  |
| C | 15.982418000 | 7.964940000  | 1.366297000  |
| C | 13.644948000 | 11.440183000 | 6.210891000  |
| C | 13.434075000 | 14.935933000 | 6.979506000  |
| C | 14.923303000 | 12.749331000 | 1.041902000  |
| C | 15.484214000 | 3.528060000  | 7.003289000  |
| C | 13.368888000 | 8.753536000  | 10.066294000 |

## SUPPORTING INFORMATION

---

|   |              |              |              |
|---|--------------|--------------|--------------|
| H | 13.042476000 | 9.612322000  | 10.661488000 |
| O | 14.636912000 | 7.187366000  | -1.106641000 |
| C | 10.791543000 | 14.415461000 | 7.913341000  |
| C | 14.337023000 | 1.223918000  | 13.298606000 |
| C | 15.735699000 | 6.202681000  | 3.149226000  |
| H | 16.057641000 | 5.341413000  | 2.555281000  |
| C | 16.476194000 | 1.302056000  | 6.582908000  |
| C | 15.600427000 | 1.884259000  | 8.860859000  |
| C | 12.608252000 | 8.004076000  | 12.798502000 |
| C | 11.467873000 | 13.490101000 | 7.101585000  |
| H | 10.978741000 | 12.551295000 | 6.801512000  |
| C | 13.381310000 | 12.726808000 | 5.703814000  |
| C | 13.843838000 | 3.522717000  | 12.479007000 |
| C | 15.829834000 | 2.264778000  | 7.521928000  |
| C | 13.634245000 | 13.105361000 | 4.367647000  |
| C | 14.369671000 | 2.241203000  | 12.208953000 |
| C | 15.885380000 | 9.299384000  | 0.913382000  |
| C | 13.494784000 | 7.397453000  | 10.549618000 |
| C | 15.204468000 | 15.749300000 | -2.058057000 |
| C | 16.351071000 | 9.741207000  | -0.381827000 |
| H | 16.853933000 | 9.107931000  | -1.120082000 |
| C | 14.935942000 | 1.868843000  | 10.970156000 |
| C | 13.749919000 | 14.420454000 | 2.528771000  |
| H | 13.661828000 | 15.233284000 | 1.800560000  |
| C | 15.671849000 | 3.911054000  | 5.624323000  |
| H | 16.027870000 | 3.253803000  | 4.824940000  |
| O | 13.558062000 | -2.802364000 | 16.199561000 |
| O | 18.440608000 | 2.719117000  | 6.297658000  |
| C | 11.461762000 | 15.616880000 | 8.210934000  |
| H | 10.948328000 | 16.359737000 | 8.830481000  |
| C | 16.059963000 | 11.079208000 | -0.474888000 |
| H | 16.282649000 | 11.756540000 | -1.305730000 |

## SUPPORTING INFORMATION

---

|   |              |              |              |
|---|--------------|--------------|--------------|
| C | 12.768194000 | 15.914171000 | 7.769874000  |
| C | 13.307345000 | 14.405886000 | 3.827986000  |
| H | 12.791490000 | 15.202941000 | 4.373364000  |
| C | 17.711378000 | 1.612981000  | 5.949159000  |
| C | 13.161062000 | 6.988581000  | 11.855482000 |
| C | 13.293736000 | 5.658954000  | 12.313543000 |
| C | 13.269207000 | 8.337652000  | 14.008336000 |
| C | 16.002176000 | 0.610507000  | 9.415638000  |
| H | 16.542850000 | -0.172110000 | 8.872860000  |
| C | 14.276518000 | -0.711516000 | 15.365034000 |
| C | 11.368163000 | 8.606470000  | 12.491955000 |
| H | 10.885250000 | 8.321444000  | 11.547944000 |
| C | 13.189432000 | 3.886861000  | 13.719060000 |
| H | 12.996624000 | 3.210526000  | 14.558160000 |
| C | 15.264571000 | 16.753958000 | -3.162399000 |
| C | 9.378605000  | 14.090961000 | 8.430178000  |
| C | 15.585916000 | 0.598166000  | 10.724488000 |
| H | 15.726415000 | -0.197278000 | 11.463650000 |
| C | 12.853212000 | 5.213427000  | 13.616383000 |
| H | 12.336382000 | 5.836477000  | 14.353636000 |
| C | 15.791738000 | 0.126094000  | 6.224193000  |
| H | 14.837844000 | -0.086515000 | 6.730024000  |
| O | 14.691070000 | 16.636127000 | -4.236101000 |
| C | 15.844721000 | 6.621899000  | -0.788784000 |
| C | 10.753994000 | 9.512249000  | 13.366170000 |
| C | 11.412122000 | 9.776249000  | 14.586872000 |
| H | 10.933502000 | 10.469081000 | 15.290589000 |
| C | 12.653193000 | 9.220360000  | 14.944399000 |
| C | 14.279520000 | -1.696574000 | 16.488496000 |
| C | 18.190883000 | 0.808497000  | 4.879263000  |
| C | 14.348213000 | 13.611278000 | -1.261330000 |
| H | 13.737498000 | 12.711254000 | -1.425552000 |

## SUPPORTING INFORMATION

---

|   |              |              |              |
|---|--------------|--------------|--------------|
| C | 17.748000000 | 6.315940000  | 0.713285000  |
| H | 18.261026000 | 6.572821000  | 1.653619000  |
| C | 9.422034000  | 10.212237000 | 13.043851000 |
| C | 18.339471000 | 5.408634000  | -0.176258000 |
| C | 14.437116000 | 14.584305000 | -2.261099000 |
| H | 13.907650000 | 14.457599000 | -3.216656000 |
| C | 14.990965000 | 0.491815000  | 15.535091000 |
| H | 15.527942000 | 0.661137000  | 16.479793000 |
| C | 15.881266000 | 15.925502000 | -0.833262000 |
| H | 16.486965000 | 16.827321000 | -0.669321000 |
| C | 15.018840000 | 1.449103000  | 14.516862000 |
| H | 15.588737000 | 2.379697000  | 14.655324000 |
| C | 13.446882000 | 17.248629000 | 8.148026000  |
| C | 17.673555000 | 5.154095000  | -1.391398000 |
| H | 18.140809000 | 4.458637000  | -2.100198000 |
| C | 15.786361000 | 14.953878000 | 0.169098000  |
| H | 16.325055000 | 15.094614000 | 1.117830000  |
| C | 16.435266000 | 5.731147000  | -1.732675000 |
| C | 15.732756000 | 14.234647000 | 6.727256000  |
| H | 15.813690000 | 13.541347000 | 5.864167000  |
| H | 15.574922000 | 13.644280000 | 7.653908000  |
| H | 16.687496000 | 14.790136000 | 6.815914000  |
| C | 17.450218000 | -0.346632000 | 4.553843000  |
| H | 17.822052000 | -0.981754000 | 3.742695000  |
| C | 13.625906000 | 0.013468000  | 13.132772000 |
| H | 13.080934000 | -0.170561000 | 12.195110000 |
| C | 16.270686000 | -0.732041000 | 5.219566000  |
| C | 13.591859000 | -0.942656000 | 14.153810000 |
| H | 13.027760000 | -1.875192000 | 14.015291000 |
| C | 13.322013000 | 9.567079000  | 16.291995000 |
| C | 13.814883000 | 18.029689000 | 6.865022000  |
| H | 14.509082000 | 17.455465000 | 6.224300000  |

## SUPPORTING INFORMATION

---

|   |              |              |              |
|---|--------------|--------------|--------------|
| H | 14.299916000 | 18.992945000 | 7.128869000  |
| H | 12.906308000 | 18.262278000 | 6.271361000  |
| C | 13.570238000 | 7.140298000  | -0.157075000 |
| H | 12.626214000 | 7.143979000  | -0.737579000 |
| H | 13.565517000 | 8.022302000  | 0.517014000  |
| H | 13.610542000 | 6.215422000  | 0.455406000  |
| C | 16.143136000 | 18.835670000 | -3.848715000 |
| H | 16.590577000 | 18.426474000 | -4.776938000 |
| H | 16.798822000 | 19.617496000 | -3.425704000 |
| H | 15.149877000 | 19.264406000 | -4.091684000 |
| C | 19.689726000 | 4.780362000  | 0.144910000  |
| H | 19.825196000 | 4.866349000  | 1.245274000  |
| C | 19.462951000 | 1.189559000  | 4.091929000  |
| C | 13.507174000 | -3.802200000 | 17.227644000 |
| H | 12.884103000 | -4.622344000 | 16.828636000 |
| H | 13.052378000 | -3.396117000 | 18.153668000 |
| H | 14.522558000 | -4.178630000 | 17.465650000 |
| C | 15.555122000 | 7.856001000  | 13.390970000 |
| H | 15.575578000 | 6.970687000  | 12.721604000 |
| H | 16.496389000 | 7.870373000  | 13.975615000 |
| H | 15.502920000 | 8.777065000  | 12.773601000 |
| C | 14.714575000 | 16.976936000 | 8.991313000  |
| H | 14.462044000 | 16.418471000 | 9.916360000  |
| H | 15.182915000 | 17.936599000 | 9.295109000  |
| H | 15.468980000 | 16.394066000 | 8.432252000  |
| C | 12.518767000 | 18.146607000 | 8.987552000  |
| H | 11.586455000 | 18.411037000 | 8.448245000  |
| H | 13.042862000 | 19.095280000 | 9.222026000  |
| H | 12.238663000 | 17.679646000 | 9.953771000  |
| C | 15.746182000 | 5.399195000  | -3.073904000 |
| C | 20.694128000 | 1.162085000  | 5.026847000  |
| H | 20.594549000 | 1.880425000  | 5.861211000  |



## SUPPORTING INFORMATION

---

|   |              |              |              |
|---|--------------|--------------|--------------|
| H | 21.611360000 | 1.423193000  | 4.458347000  |
| H | 20.841347000 | 0.149950000  | 5.457268000  |
| C | 18.693405000 | 2.988812000  | 7.677163000  |
| H | 19.660325000 | 3.528326000  | 7.723380000  |
| H | 18.777353000 | 2.052006000  | 8.266598000  |
| H | 17.912929000 | 3.635437000  | 8.130057000  |
| C | 12.449865000 | 10.514577000 | 17.136843000 |
| H | 12.280224000 | 11.490749000 | 16.638481000 |
| H | 12.961647000 | 10.722278000 | 18.098386000 |
| H | 11.461344000 | 10.073907000 | 17.378965000 |
| C | 19.290947000 | 2.599323000  | 3.476105000  |
| H | 18.418414000 | 2.627210000  | 2.791079000  |
| H | 20.192025000 | 2.867752000  | 2.886959000  |
| H | 19.142173000 | 3.370921000  | 4.253249000  |
| C | 20.827425000 | 5.572769000  | -0.523440000 |
| H | 20.737442000 | 5.538618000  | -1.630078000 |
| H | 21.818609000 | 5.153423000  | -0.251306000 |
| H | 20.812642000 | 6.638859000  | -0.217835000 |
| C | 8.367438000  | 9.823222000  | 14.103316000 |
| H | 8.183904000  | 8.728943000  | 14.102350000 |
| H | 7.402055000  | 10.330887000 | 13.896663000 |
| H | 8.683380000  | 10.112154000 | 15.126208000 |
| C | 8.816728000  | 15.209351000 | 9.323466000  |
| H | 8.720652000  | 16.170838000 | 8.778906000  |
| H | 9.447321000  | 15.382936000 | 10.219356000 |
| H | 7.804633000  | 14.930769000 | 9.681219000  |
| C | 9.640947000  | 11.741835000 | 13.075811000 |
| H | 9.955711000  | 12.093504000 | 14.079137000 |
| H | 8.704154000  | 12.276357000 | 12.813963000 |
| H | 10.422703000 | 12.049576000 | 12.351521000 |
| C | 19.734523000 | 0.211929000  | 2.933327000  |
| H | 19.919451000 | -0.823270000 | 3.285682000  |

## SUPPORTING INFORMATION

---

|   |              |              |              |
|---|--------------|--------------|--------------|
| H | 20.641245000 | 0.538773000  | 2.384795000  |
| H | 18.900909000 | 0.184975000  | 2.202110000  |
| C | 8.889596000  | 9.821092000  | 11.655215000 |
| H | 9.598564000  | 10.090110000 | 10.846080000 |
| H | 7.937678000  | 10.352484000 | 11.452909000 |
| H | 8.682687000  | 8.734046000  | 11.580936000 |
| C | 8.428144000  | 13.896316000 | 7.228003000  |
| H | 8.365815000  | 14.818446000 | 6.613983000  |
| H | 7.403744000  | 13.649717000 | 7.577617000  |
| H | 8.762297000  | 13.071597000 | 6.566537000  |
| C | 19.766664000 | 3.291883000  | -0.221507000 |
| H | 18.937858000 | 2.711022000  | 0.231173000  |
| H | 20.721312000 | 2.852032000  | 0.133238000  |
| H | 19.728873000 | 3.135501000  | -1.320047000 |
| C | 9.433958000  | 12.786771000 | 9.257682000  |
| H | 9.794718000  | 11.928449000 | 8.655486000  |
| H | 8.426251000  | 12.525370000 | 9.641866000  |
| H | 10.111477000 | 12.896719000 | 10.128623000 |
| C | 13.538688000 | 8.275504000  | 17.114531000 |
| H | 12.570106000 | 7.777474000  | 17.328430000 |
| H | 14.014795000 | 8.517102000  | 18.087991000 |
| H | 14.186621000 | 7.556413000  | 16.580395000 |
| C | 14.383534000 | 4.715282000  | -2.815132000 |
| H | 14.513970000 | 3.781771000  | -2.229535000 |
| H | 13.905012000 | 4.443389000  | -3.779309000 |
| H | 13.686056000 | 5.372511000  | -2.264891000 |
| C | 16.591282000 | 4.435064000  | -3.927523000 |
| H | 17.585514000 | 4.856547000  | -4.179811000 |
| H | 16.065622000 | 4.237015000  | -4.883612000 |
| H | 16.747323000 | 3.456100000  | -3.430218000 |
| C | 15.547330000 | 6.695354000  | -3.893768000 |
| H | 14.918835000 | 7.426732000  | -3.353203000 |

## SUPPORTING INFORMATION

---

|    |              |              |              |
|----|--------------|--------------|--------------|
| H  | 15.057454000 | 6.463799000  | -4.862857000 |
| H  | 16.523458000 | 7.174343000  | -4.116668000 |
| C  | 14.673274000 | 10.277438000 | 16.044775000 |
| H  | 15.387550000 | 9.634049000  | 15.499556000 |
| H  | 15.138601000 | 10.557933000 | 17.012939000 |
| H  | 14.529250000 | 11.208661000 | 15.458727000 |
| C  | 15.493954000 | -2.014899000 | 4.872395000  |
| C  | 15.404871000 | -2.903811000 | 6.133206000  |
| H  | 16.414751000 | -3.193305000 | 6.490547000  |
| H  | 14.840464000 | -3.834575000 | 5.915198000  |
| H  | 14.887309000 | -2.387189000 | 6.966833000  |
| C  | 16.175296000 | -2.820374000 | 3.753658000  |
| H  | 16.240373000 | -2.246781000 | 2.806559000  |
| H  | 15.590529000 | -3.738724000 | 3.542622000  |
| H  | 17.200215000 | -3.138479000 | 4.034059000  |
| C  | 14.068723000 | -1.639746000 | 4.408370000  |
| H  | 13.507999000 | -1.092913000 | 5.193139000  |
| H  | 13.487907000 | -2.552255000 | 4.158661000  |
| H  | 14.098759000 | -0.997159000 | 3.504253000  |
| Cu | 14.716571000 | 10.365101000 | 3.535994000  |
| Cu | 14.453052000 | 4.603858000  | 9.686939000  |
